# Supplementary material for: Hydrogen-bonding-induced bathochromic effect of Si-coumarin and its use in monitoring adipogenic differentiation
Source: Royal Society of Chemistry journal article supplement (doi:10.1039/c9cc05895h), 2019-01-01
Supplement: c9cc05895h1.pdf [file c9cc05895h1.pdf]

## Supporting Information

### **Si-coumarin of hydrogen-bonding induced bathochromic effect for monitoring adipogenic differentiation**

Chen Li,<sup>[a]†</sup> Ting Wang,<sup>[b]†</sup> Ni Li,<sup>[a]</sup> Min Li,<sup>[a]</sup> Yuntao Li,<sup>[a]</sup> Yan Sun,<sup>[a]</sup> Yang Tian,<sup>[a]</sup> Junru Zhu,<sup>[a]</sup> Yiqian Wu,<sup>[a]</sup> Dazhi Zhang,<sup>[b]</sup> and Xiaoyan Cui<sup>\*[a]</sup>

## Table of contents

|                                         |                 |
|-----------------------------------------|-----------------|
| <b>1. Experimental Details.....</b>     | <b>S2-S13</b>   |
| <b>2. Photophysical Properties.....</b> | <b>S14-S23</b>  |
| <b>3. Biological Experiments.....</b>   | <b>S24-27</b>   |
| <b>4. Theoretical Calculations.....</b> | <b>S28-29</b>   |
| <b>5. NMR and HRMS Spectra.....</b>     | <b>S30- S56</b> |

## 1. Experimental details

**Materials and instruments.** Unless otherwise stated, all reagents were purchased from commercial suppliers (including Sigma-Aldrich, Adamas-beta and TCI) and used without further purification. The composition of mixed solvents is given by the volume ratio (*v/v*). Thin layer chromatography (TLC) was performed on TLC-aluminum sheets (Silica gel 60 F254). Flash column chromatography was performed with General-Reagent silica gel (200-300 mesh and type H). <sup>1</sup>H NMR spectra and <sup>13</sup>C NMR were recorded using Bruker Avance spectrometer (500 MHz for <sup>1</sup>H NMR and 125 MHz for <sup>13</sup>C NMR) with tetramethylsilane (TMS) as internal standard. The chemical shifts in <sup>1</sup>H NMR spectra are reported in  $\delta$  ppm using the residual proton of the solvents, CDCl<sub>3</sub> (7.26ppm) as an internal standard and those in <sup>13</sup>C NMR spectra are reported using the solvent signal of CDCl<sub>3</sub> (77.16 ppm), as an internal standard. The HRMS were recorded using A Bruker maXis impact. A SHIMADZU UV-2600 UV-vis spectrophotometer was used for absorption measurement and a SHIMADZU RF-6000 spetrofluorophotometer was used for fluorescent measurement. A Leica SP8 confocal laser scanning microscope was applied for cell imaging.

### Scheme S1. Synthesis of Si-Coumarins

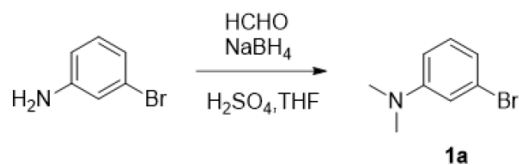

To a dried flask was added m-bromoaniline (4 g, 23.26 mmol), 3M H<sub>2</sub>SO<sub>4</sub> (1.8 eq, 14 mL), and formaldehyde solution (3 eq), the mixture was stirred in an ice bath for 30 min. NaBH<sub>4</sub> (4 eq, 3.4 g) was added in portions under the ice bath. Then stirred at room temperature for 2 hours. After the reaction was completed, saturated NaHCO<sub>3</sub> solution was added and extracted with ethyl acetate. The organic phase was combined, washed with saturated brine for 2 times, then dried with anhydrous Na<sub>2</sub>SO<sub>4</sub>, and the solvent was removed under vacuum. The residue was further purified by column chromatography to afford 1a (3.95 g, 85 %).

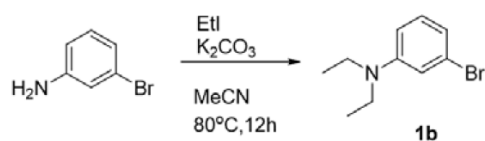

To a dried flask was added m-bromoaniline (4 g, 23.26 mmol), potassium carbonate (3.16 g, 1 eq), iodoethane (8 g, 2.2 eq) and acetonitrile solution (40 mL). The mixture was stirred at 80 °C for 12 hours. After the reaction was completed, filtrated and extracted with ethyl acetate. The organic phase was combined, washed with saturated brine, and then dried with anhydrous Na<sub>2</sub>SO<sub>4</sub>, and the solvent was removed under vacuum. The residue was further purified by column chromatography sto afford 1b (4.2 g, 80 %).

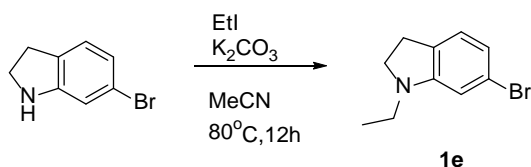

To a dried flask was added 6-bromindoline (2 g, 10 mmol), potassium carbonate (1.36 g, 1 eq), iodoethane (3.43 g, 2.2 eq) and acetonitrile (20 mL). The mixture was stirred at 80 °C for

12 hours. After the reaction was completed, filtrated and extracted with ethyl acetate. The organic phase was combined, washed with saturated brine, and then dried with anhydrous  $\text{Na}_2\text{SO}_4$ , the solvent was removed under vacuum. The residue was further purified by column chromatography to afford **1e** (1.85 g, 82 %).

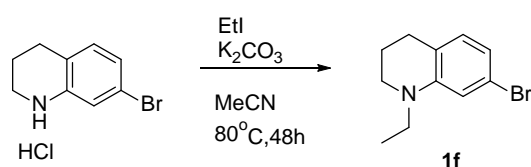

To a dried flask was added 7-bromo-1,2,3,4-tetrahydroquinoline hydrochloride (2 g, 8 mmol), potassium carbonate (6.66 g, 6 eq), iodoethane (5 g, 4 eq) and acetonitrile 40 mL). The mixture was stirred at 80 °C for 48 hours. After the reaction was completed, filtrated and extracted with ethyl acetate. The organic phase was combined, washed with saturated brine, and then dried with anhydrous  $\text{Na}_2\text{SO}_4$ , the solvent was removed under vacuum. The residue was further purified by column chromatography to afford **1e** (1.34 g, 70 %).

### General procedures for synthesizing **2a-2f**

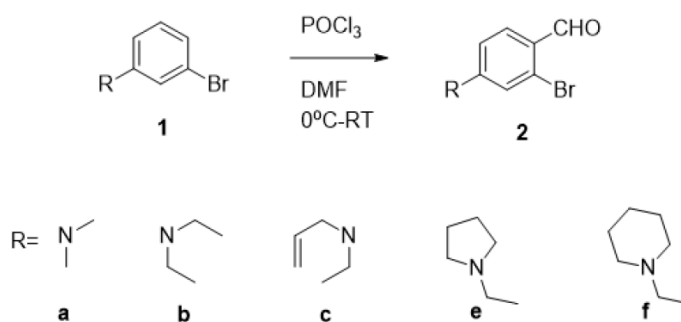

To a dried flask filled with argon was added DMF (10mL) and  $\text{POCl}_3$  (2.8 ml, 3 eq) in an ice bath, and stirred for 30 min at 0 °C. Then the DMF solution of compound **1** (10 mmol) was added to the flask and stirred for 6 h at room temperature. When the reaction was completed, the solution was poured into ice water and the precipitate was filtrated and washed with water for three times, then the solid was dissolved with dichloromethane and dried over  $\text{Na}_2\text{SO}_4$ , and evaporated. The residue was purified by column chromatography to obtain **2a-2f**. Yield is 80 %.

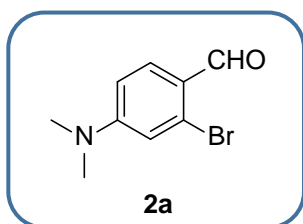

White solid,  $^1\text{H}$  NMR (500 MHz, Chloroform-*d*)  $\delta$  10.09 (s, 1H), 7.79 (d,  $J = 8.9$  Hz, 1H), 6.79 (d,  $J = 2.4$  Hz, 1H), 6.63 (dd,  $J = 8.9, 2.0$  Hz, 1H), 3.08 (s, 6H).  $^{13}\text{C}$  NMR (126 MHz, Chloroform-*d*)  $\delta$  190.22, 154.49, 131.04, 129.71, 122.01, 114.83, 110.58, 40.09.

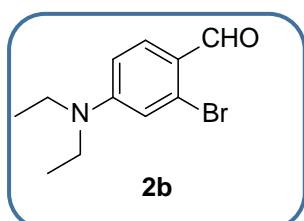

White solid,  $^1\text{H}$  NMR (500 MHz, Chloroform-*d*)  $\delta$  10.00 (s, 1H), 7.72 (d,  $J = 9.0$  Hz, 1H), 6.72 (d,  $J = 2.4$  Hz, 1H), 6.56 (dd,  $J = 9.0, 2.1$  Hz, 1H), 3.36 (q,  $J = 7.1$  Hz, 4H), 1.17 (t,  $J = 7.2$  Hz, 6H).  $^{13}\text{C}$  NMR (126 MHz, Chloroform-*d*)  $\delta$  189.75, 152.47, 130.02, 121.44, 114.30, 110.25, 44.77, 12.41.

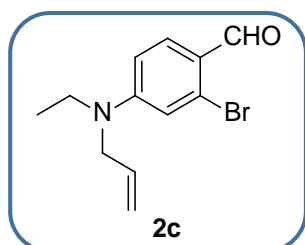

Colorless oil,  $^1\text{H}$  NMR (500 MHz, Chloroform-*d*)  $\delta$  10.06 (s, 1H), 7.77 (d,  $J = 8.9$  Hz, 1H), 6.79 (d,  $J = 2.4$  Hz, 1H), 6.62 (dd,  $J = 8.9, 2.2$  Hz, 1H), 5.82 (ddt,  $J = 16.8, 10.2, 4.6$  Hz, 1H), 5.32 – 5.11 (m, 2H), 3.99 – 3.95 (m, 2H), 3.44 (q,  $J = 7.1$  Hz, 2H), 1.23 (t,  $J = 7.1$  Hz, 3H).  $^{13}\text{C}$  NMR (126 MHz, Chloroform-*d*)  $\delta$  190.02, 153.03, 131.96, 131.21, 129.88, 122.00, 116.84, 114.76, 110.63, 52.47, 45.29, 12.25.

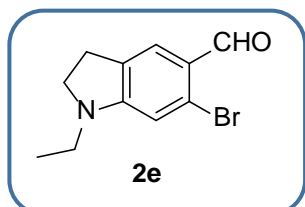

White solid,  $^1\text{H}$  NMR (500 MHz, Chloroform-*d*)  $\delta$  10.04 (s, 1H), 7.57 (s, 1H), 6.47 (s, 1H), 3.62 (t,  $J = 8.6$  Hz, 2H), 3.28 (q,  $J = 7.2$  Hz, 2H), 2.99 (t,  $J = 8.4$  Hz, 2H), 1.21 (t,  $J = 7.2$  Hz, 3H).  $^{13}\text{C}$  NMR (126 MHz, Chloroform-*d*)  $\delta$  189.97, 157.08, 130.37, 129.86, 124.78, 122.63, 108.44, 51.41, 41.06, 26.70, 11.65.

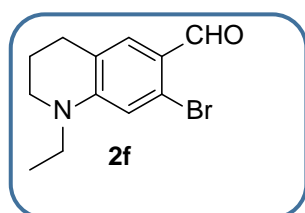

White solid,  $^1\text{H}$  NMR (500 MHz, Chloroform-*d*)  $\delta$  10.02 (s, 1H), 7.52 (s, 1H), 6.68 (s, 1H), 3.44 – 3.33 (m, 4H), 2.71 (t,  $J = 6.3$  Hz, 2H), 1.94 (p,  $J = 6.1$  Hz, 2H), 1.22 (t,  $J = 7.1$  Hz, 3H).  $^{13}\text{C}$  NMR (126 MHz, Chloroform-*d*)  $\delta$  190.03, 150.40, 129.73, 128.02, 121.44, 121.24, 112.81, 48.56, 45.68, 27.42, 21.28, 11.10.

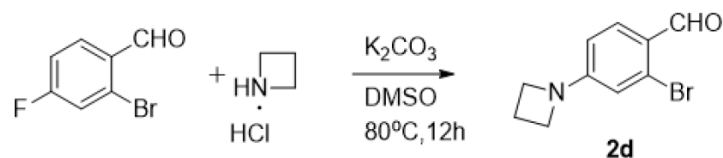

To a dried flask was added 2-bromo-4-fluorobenzaldehyde (2 g, 8 mmol), potassium carbonate (6.66 g, 6 eq), iodoethane (5 g, 4 eq) and acetonitrile 40 mL). The mixture was stirred at 80 °C for 48 hours. After the reaction was completed, filtrated and extracted with ethyl acetate. The organic phase was combined, washed with saturated brine, and then dried with anhydrous  $\text{Na}_2\text{SO}_4$ , the solvent was removed under vacuum. The residue was further purified by column chromatography to afford **2d** (1.34 g, 70 %).

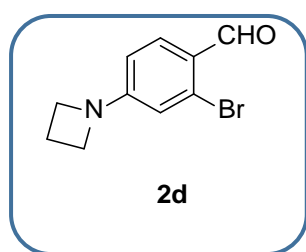

White solid,  $^1\text{H}$  NMR (500 MHz, Chloroform-*d*)  $\delta$  10.07 (s, 1H), 7.76 (d,  $J = 8.6$  Hz, 1H), 6.46 (d,  $J = 2.2$  Hz, 1H), 6.29 (dd,  $J = 8.6, 1.8$  Hz, 1H), 4.03 (t,  $J = 7.4$  Hz, 4H), 2.44 (q,  $J = 7.4$  Hz, 2H).  $^{13}\text{C}$  NMR (126 MHz, Chloroform-*d*)  $\delta$  190.20 , 154.95 , 131.16 , 129.58 , 122.33 , 113.34 , 109.21 , 51.33 , 16.35 .

### General procedures for synthesizing 3a-3f

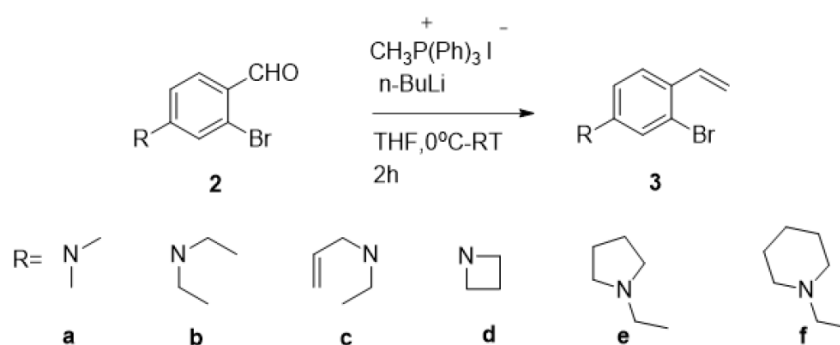

To a dried and argon protected flask was added methyl triphenyl phosphor iodide (4.8 g, 1.2 eq), anhydrous THF (20 mL) and *n*-BuLi (6.8 mL, 1.1eq) then stirred in an ice bath for 30 min. Then the compound **2** (10 mmol) of THF solution was added in drops and stirred at room temperature for 1.5 h. After the reaction was completed, the mixture was filtered by silica gel (200-300 mesh). Then the filtrate was wash with water and dried over  $\text{Na}_2\text{SO}_4$ , the solvent was

removed under vacuum. The residue was directly used in following steps without further purification. Colorless oil, yield 60%.

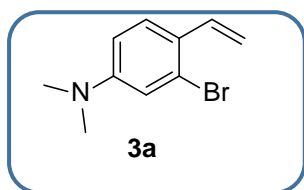

$^1\text{H NMR}$  (500 MHz, Chloroform-*d*)  $\delta$  7.47 (d,  $J = 8.8$  Hz, 1H), 7.01 (dd,  $J = 17.4, 10.9$  Hz, 1H), 6.89 (d,  $J = 2.5$  Hz, 1H), 6.67 (dd,  $J = 8.8, 2.5$  Hz, 1H), 5.55 (d,  $J = 17.4$  Hz, 1H), 5.16 (d,  $J = 10.9$  Hz, 1H), 2.98 (s, 6H).  $^{13}\text{C NMR}$  (126 MHz, Chloroform-*d*)  $\delta$  126.77, 124.85, 115.53, 112.17, 111.78, 40.31.

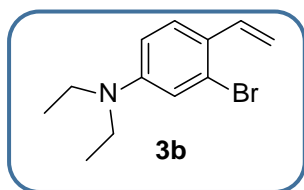

$^1\text{H NMR}$  (500 MHz, Chloroform-*d*)  $\delta$  7.41 (d,  $J = 8.8$  Hz, 1H), 6.96 (dd,  $J = 17.4, 10.9$  Hz, 1H), 6.80 (d,  $J = 2.7$  Hz, 1H), 6.59 (dd,  $J = 8.8, 2.6$  Hz, 1H), 5.49 (d,  $J = 17.4$  Hz, 1H), 5.09 (d,  $J = 10.9$  Hz, 1H), 3.33 (q,  $J = 7.1$  Hz, 4H), 1.16 (t,  $J = 7.1$  Hz, 6H).  $^{13}\text{C NMR}$  (126 MHz, Chloroform-*d*)  $\delta$  135.33, 126.94, 114.73, 111.54, 111.16, 77.29, 44.40, 12.53.

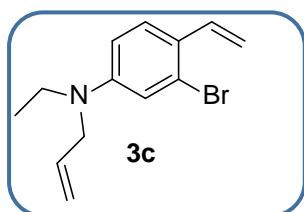

$^1\text{H NMR}$  (500 MHz, Chloroform-*d*)  $\delta$  7.46 (d,  $J = 8.8$  Hz, 1H), 7.02 (dd,  $J = 17.4, 10.9$  Hz, 1H), 6.88 (d,  $J = 2.4$  Hz, 1H), 6.65 (dd,  $J = 8.8, 2.4$  Hz, 1H), 5.87 (ddd,  $J = 16.2, 10.3, 4.7$  Hz, 1H), 5.55 (d,  $J = 17.4$  Hz, 1H), 5.22 (s, 1H), 5.19 (d,  $J = 5.8$  Hz, 1H), 5.16 (d,  $J = 11.0$  Hz, 1H), 3.95 – 3.90 (m, 2H), 3.41 (q,  $J = 7.1$  Hz, 2H), 1.22 (t,  $J = 7.1$  Hz, 3H).  $^{13}\text{C NMR}$  (126 MHz, Chloroform-*d*)  $\delta$  148.59, 135.33, 133.52, 126.90, 125.02, 124.61, 116.19, 115.11, 111.85, 111.50, 52.50, 44.92, 12.33.

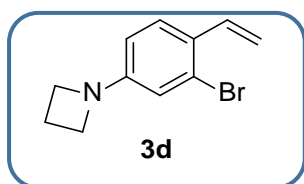

$^1\text{H NMR}$  (500 MHz, Chloroform-*d*)  $\delta$  7.40 (d,  $J = 8.5$  Hz, 1H), 6.96 (dd,  $J = 17.4, 10.9$  Hz, 1H), 6.57 (d,  $J = 2.4$  Hz, 1H), 6.34 (dd,  $J = 8.5, 2.3$  Hz, 1H), 5.50 (dd,  $J = 17.4, 1.1$  Hz, 1H), 5.13 (dd,  $J = 10.9, 1.1$  Hz, 1H), 3.89 – 3.85 (m, 4H), 2.37 (q,  $J = 7.3$  Hz, 2H).  $^{13}\text{C NMR}$  (126 MHz, Chloroform-*d*)  $\delta$  152.27, 135.42, 126.81, 125.92, 124.48, 114.59, 112.39, 110.73, 77.05, 52.26, 16.81.

#### General procedures for synthesizing 4a-4f:



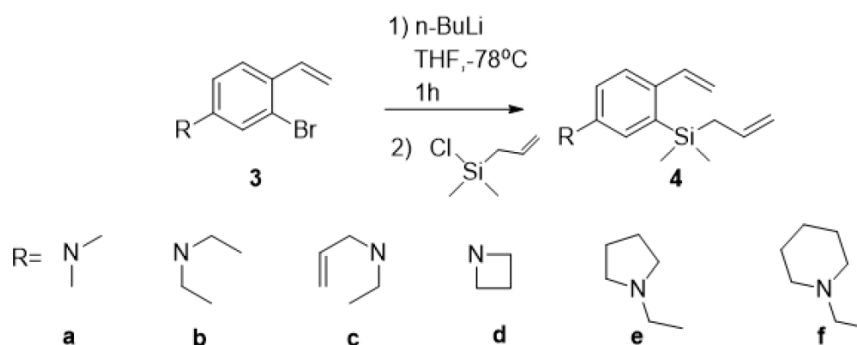

To a dried and argon protected flask was added compound **3** (5 mmol, 1.0 eq) and anhydrous THF (10 mL), the mixture stirred at  $-78\text{ }^{\circ}\text{C}$  for 5 min, then the *n*-BuLi (1.2 eq, 3.75 mL, 1.6 M in hexane solution) was added, and the mixture was stirred for 1h at  $-78\text{ }^{\circ}\text{C}$ . After 1h, the allyldimethylchlorosilane (0.98 mL, 1.3 eq) was added in drops and stirred for overnight from  $-78\text{ }^{\circ}\text{C}$  to room temperature. After the reaction was completed, quenched reaction with water and extracted with ethyl acetate then washed the organic phase with water and brine, and dried over  $\text{Na}_2\text{SO}_4$ , the solvent was removed under vacuum. The residue was further purified by column chromatography to afford compound **4**, colorless oil, yield 85%.

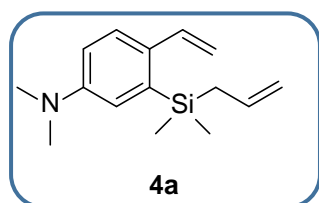

$^1\text{H}$  NMR (500 MHz, Chloroform-*d*)  $\delta$  7.55 (d,  $J = 8.6$  Hz, 1H), 7.01 (dd,  $J = 17.1, 10.9$  Hz, 1H), 6.88 (s, 1H), 6.78 (d,  $J = 8.5$  Hz, 1H), 5.84 (dq,  $J = 17.3, 8.9$  Hz, 1H), 5.56 – 5.49 (m, 1H), 5.12 (d,  $J = 10.8$  Hz, 1H), 4.92 (dd,  $J = 26.2, 13.5$  Hz, 2H), 2.99 (s, 6H), 1.90 (d,  $J = 8.0$  Hz, 2H), 0.38 (s, 6H).  $^{13}\text{C}$  NMR (126 MHz, Chloroform-*d*)  $\delta$  149.18, 137.59, 135.01, 126.07, 118.30, 113.76, 113.50, 111.16, 40.56,

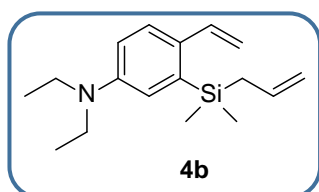

$^1\text{H}$  NMR (500 MHz, Chloroform-*d*)  $\delta$  7.54 (d,  $J = 8.7$  Hz, 1H), 7.00 (dd,  $J = 17.2, 10.8$  Hz, 1H), 6.84 (d,  $J = 2.6$  Hz, 1H), 6.74 (dd,  $J = 8.6, 2.4$  Hz, 1H), 5.92 – 5.79 (m, 1H), 5.51 (d,  $J = 17.2$  Hz, 1H), 5.09 (d,  $J = 11.7$  Hz, 1H), 4.93 (dd,  $J = 25.2, 12.7$  Hz, 2H), 3.43 – 3.39 (m, 4H), 1.90 (d,  $J = 8.1$  Hz, 2H), 1.22 (t,  $J = 7.1$  Hz, 6H), 0.38 (s, 6H).  $^{13}\text{C}$  NMR (126 MHz, Chloroform-*d*)  $\delta$  137.53, 135.05, 126.21, 117.41, 113.41, 112.87, 110.42, 44.46, 24.31, 12.66, -1.86.

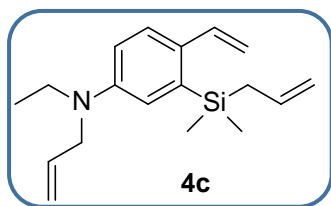

$^1\text{H NMR}$  (500 MHz, Chloroform-*d*)  $\delta$  7.55 (d,  $J = 8.7$  Hz, 1H), 7.02 (dd,  $J = 17.2, 10.8$  Hz, 1H), 6.86 (d,  $J = 2.6$  Hz, 1H), 6.76 (dd,  $J = 8.7, 2.6$  Hz, 1H), 5.95 – 5.83 (m, 2H), 5.56 – 5.50 (m, 1H), 5.25 (dd,  $J = 17.2, 1.6$  Hz, 1H), 5.23 – 5.20 (m, 1H), 5.14 – 5.09 (m, 1H), 5.00 – 4.90 (m, 2H), 3.97 (d,  $J = 4.9$  Hz, 2H), 3.48 – 3.44 (m, 2H), 1.91 (d,  $J = 8.1$  Hz, 2H), 1.24 (d,  $J = 7.1$  Hz, 3H), 0.40 (s, 6H).  $^{13}\text{C NMR}$  (126 MHz, Chloroform-*d*)  $\delta$  146.78, 137.54, 135.05, 134.43, 127.31, 126.11, 117.78, 115.95, 113.43, 113.14, 110.66, 52.80, 44.88, 24.30, 12.43, -1.85.

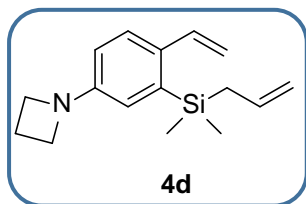

$^1\text{H NMR}$  (500 MHz, Chloroform-*d*)  $\delta$  7.53 (d,  $J = 8.4$  Hz, 1H), 7.02 (dd,  $J = 17.2, 10.8$  Hz, 1H), 6.59 (d,  $J = 2.5$  Hz, 1H), 6.51 (dd,  $J = 8.4, 2.4$  Hz, 1H), 5.85 (td,  $J = 17.6, 8.1$  Hz, 1H), 5.54 (d,  $J = 17.2$  Hz, 1H), 5.14 (d,  $J = 10.8$  Hz, 1H), 5.00 – 4.88 (m, 2H), 3.94 (t,  $J = 7.2$  Hz, 4H), 2.41 (p,  $J = 7.2$  Hz, 2H), 1.90 (d,  $J = 8.1$  Hz, 2H), 0.39 (s, 6H).  $^{13}\text{C NMR}$  (126 MHz, Chloroform-*d*)  $\delta$  150.73, 137.73, 137.37, 134.94, 132.92, 125.85, 116.98, 113.48, 112.46, 111.28, 52.41, 24.24, 17.01, -1.90.

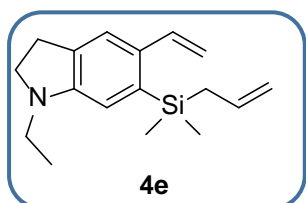

$^1\text{H NMR}$  (500 MHz, Chloroform-*d*)  $\delta$  7.43 (s, 1H), 7.03 (dd,  $J = 17.2, 10.8$  Hz, 1H), 6.61 (s, 1H), 5.92 – 5.81 (m, 1H), 5.53 (d,  $J = 17.1$  Hz, 1H), 5.11 (d,  $J = 10.9$  Hz, 1H), 4.99 – 4.89 (m, 2H), 3.40 (t,  $J = 8.3$  Hz, 2H), 3.21 (q,  $J = 7.2$  Hz, 2H), 3.01 (t,  $J = 8.2$  Hz, 2H), 1.90 (d,  $J = 8.1$  Hz, 2H), 1.25 (t,  $J = 7.2$  Hz, 3H), 0.39 (s, 6H).  $^{13}\text{C NMR}$  (126 MHz, Chloroform-*d*)  $\delta$  151.25, 137.89, 135.82, 135.09, 133.57, 132.24, 121.41, 113.37, 112.05, 110.49, 52.10, 42.92, 28.34, 24.43, 12.06, -1.72.

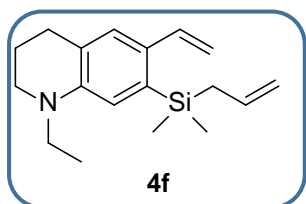

$^1\text{H NMR}$  (500 MHz, Chloroform-*d*)  $\delta$  7.53 (d,  $J = 8.4$  Hz, 1H), 7.02 (dd,  $J = 17.2, 10.8$  Hz, 1H), 6.59 (d,  $J = 2.5$  Hz, 1H), 6.51 (dd,  $J = 8.4, 2.4$  Hz, 1H), 5.85 (td,  $J = 17.6, 8.1$  Hz, 1H), 5.54 (d,  $J = 17.2$  Hz, 1H), 5.14 (d,  $J = 10.8$  Hz, 1H), 5.00 – 4.88 (m, 2H), 3.94 (t,  $J = 7.2$  Hz, 4H), 2.41 (p,  $J = 7.2$  Hz, 2H), 1.90 (d,  $J = 8.1$  Hz, 2H), 0.39 (s, 6H).  $^{13}\text{C NMR}$  (126 MHz, Chloroform-*d*)  $\delta$  150.73, 137.73, 134.94, 125.85, 116.98, 113.48, 112.46, 111.28, 76.84, 52.41, 24.24, 17.01, -1.90.

#### General procedures for synthesizing 5a-5f:

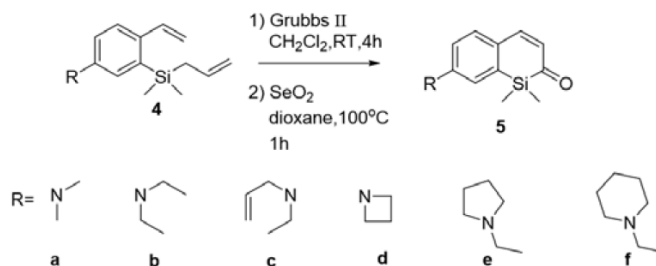

To a dried and argon protected flask was added compound **4** (1 mmol, 1.0 eq) and Grubbs II catalyst (5 % mol) and anhydrous  $\text{CH}_2\text{Cl}_2$  (10 mL), the mixture was stirred at room temperature for 4h. After the reaction was completed, the solvent was removed under vacuum and then the crude product was further dried under high vacuum pump. The residue was directly used in next step without further purified. To a dried flask was added the residue and  $\text{SeO}_2$  (122 mg, 1.1 eq) and dioxane (10 mL), the solution was refluxed at  $100^\circ\text{C}$  for 1h. After the reaction was completed, filtered with kieselguhr, the filtrate was removed under vacuum. The residue was further purified by column chromatography to afford compound **5**, orange solid, yield 50% for two steps.

**Compound 5a (SiC A):**  $^1\text{H}$  NMR (500 MHz, Chloroform-*d*)  $\delta$  7.30 (d,  $J = 10.9$  Hz, 1H), 7.24 (d,  $J = 8.6$  Hz, 1H), 6.83 (d,  $J = 2.8$  Hz, 1H), 6.65 (dd,  $J = 8.6, 2.8$  Hz, 1H), 5.97 (d,  $J = 10.9$  Hz, 1H), 3.05 (s, 6H), 0.35 (s, 6H).  $^{13}\text{C}$  NMR (126 MHz, Chloroform-*d*)  $\delta$  190.24, 150.55, 148.72, 139.68, 133.98, 129.18, 118.52, 112.33, 76.83, 40.10, -4.01. HRMS (ESI+) Calcd for  $[\text{M}+\text{H}]^+$ : 232.1152, Found: 232.1152

**Compound 5b (SiC B):**  $^1\text{H}$  NMR (500 MHz, Chloroform-*d*)  $\delta$  7.29 (d,  $J = 10.9$  Hz, 1H), 7.22 (d,  $J = 8.6$  Hz, 1H), 6.80 (s, 1H), 6.62 (d,  $J = 7.3$  Hz, 1H), 5.95 (d,  $J = 10.9$  Hz, 1H), 3.43 (q,  $J = 7.1$  Hz, 4H), 1.21 (t,  $J = 7.1$  Hz, 6H), 0.35 (s, 6H).  $^{13}\text{C}$  NMR (500MHz, Chloroform-*d*)  $\delta$  148.75, 134.27, 128.76, 126.03, 118.08, 111.70, 76.80, 44.44, 12.58, -4.06. HRMS (ESI+) Calcd for  $[\text{M}+\text{H}]^+$ : 260.1465, Found: 260.1465.

**Compound 5c:**  $^1\text{H}$  NMR (500 MHz, Chloroform-*d*)  $\delta$  7.29 (d,  $J = 10.9$  Hz, 1H), 7.22 (d,  $J = 8.6$  Hz, 1H), 6.81 (d,  $J = 2.5$  Hz, 1H), 6.64 (dd,  $J = 8.6, 2.6$  Hz, 1H), 5.95 (d,  $J = 10.9$  Hz, 1H), 5.85 (s, 1H), 5.17 (d,  $J = 22.2$  Hz, 2H), 3.97 (d,  $J = 4.4$  Hz, 2H), 3.45 (q,  $J = 7.1$  Hz, 2H), 1.22 (t,  $J = 7.1$  Hz, 3H), 0.34 (s, 6H).  $^{13}\text{C}$  NMR (126 MHz, Chloroform-*d*)  $\delta$  148.65, 134.08, 133.18, 129.03, 126.58, 118.51, 116.39, 112.14, 76.78, 52.50, 44.96, 12.37, -4.10.

**Compound 5d (SiC D):**  $^1\text{H}$  NMR (500 MHz, Chloroform-*d*)  $\delta$  7.29 (d,  $J = 11.0$  Hz, 1H), 7.21 (d,  $J = 8.3$  Hz, 1H), 6.52 (d,  $J = 2.5$  Hz, 1H), 6.37 (dd,  $J = 8.3, 2.5$  Hz, 1H), 5.97 (d,  $J = 11.0$  Hz, 1H), 3.99 (t,  $J = 7.3$  Hz, 4H), 2.43 (p,  $J = 7.3$  Hz, 2H), 0.34 (s, 6H).  $^{13}\text{C}$  NMR (126MHz, Chloroform-*d*)  $\delta$  151.63 , 148.83 , 133.81 , 129.31 , 117.41 , 111.27 , 77.05 , 51.82 , 16.66 , -4.10. HRMS (ESI+ ) Calcd for  $[\text{M}+\text{H}]^+$  :244.1152, Found: 244.1145.

**Compound 5e (SiC E):**  $^1\text{H}$  NMR (500 MHz, Chloroform-*d*)  $\delta$  7.29 – 7.24 (m, 1H), 7.06 (s, 1H), 6.56 (s, 1H), 5.94 (d,  $J = 11.0$  Hz, 1H), 3.49 (t,  $J = 8.6$  Hz, 2H), 3.26 (q,  $J = 7.2$  Hz, 2H), 3.00 (t,  $J = 9.0$  Hz, 2H), 1.21 (t,  $J = 7.2$  Hz, 3H), 0.33 (s, 6H).  $^1\text{H}$  NMR (500 MHz, Chloroform-*d*)  $\delta$  7.29 – 7.24 (m, 1H), 7.06 (s, 1H), 6.56 (s, 1H), 5.94 (d,  $J = 11.0$  Hz, 1H), 3.49 (t,  $J = 8.6$  Hz, 2H), 3.26 (q,  $J = 7.2$  Hz, 2H), 3.00 (t,  $J = 9.0$  Hz, 2H), 1.21 (t,  $J = 7.2$  Hz, 3H), 0.33 (s, 6H).  $^{13}\text{C}$  NMR (126 MHz, Chloroform-*d*)  $\delta$  153.10 , 149.13 , 139.04 , 129.12 , 128.83 , 128.24 , 112.36 , 77.30 , 51.34 , 41.91 , 27.76 , 11.88 , -4.06. HRMS (ESI+ ) Calcd for  $[\text{M}+\text{H}]^+$  :258.1309, Found: 258.1308.

**Compound 5f (SiC F):**  $^1\text{H}$  NMR (500 MHz, Chloroform-*d*)  $\delta$  7.25 (d,  $J = 10.9$  Hz, 1H), 6.97 (s, 1H), 6.73 (s, 1H), 5.95 (d,  $J = 10.9$  Hz, 1H), 3.44 (q,  $J = 7.1$  Hz, 2H), 3.40 – 3.33 (m, 2H), 2.76 (t,  $J = 6.3$  Hz, 2H), 1.98 (dt,  $J = 11.6, 6.1$  Hz, 2H), 1.20 (t,  $J = 7.1$  Hz, 3H), 0.36 (s, 6H).  $^{13}\text{C}$  NMR (126 MHz, Chloroform-*d*)  $\delta$  148.87 , 146.05 , 137.55 , 133.70 , 128.75 , 126.17 , 122.98 , 116.92 , 48.77 , 45.33 , 27.96 , 21.72 , 11.16 , -3.98 . HRMS (ESI+ ) Calcd for  $[\text{M}+\text{H}]^+$  :272.1465, Found: 272.1463.

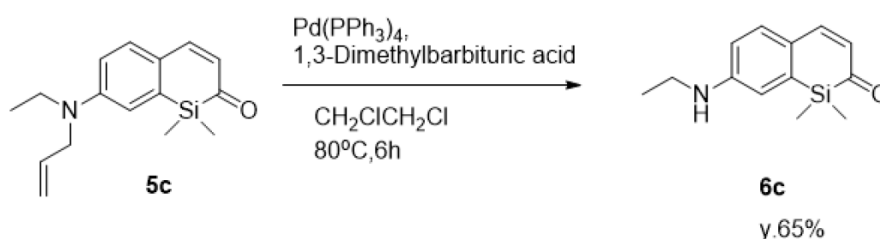

To a dried and argon protected reaction tube was added compound 5c (100 mg, 0.37 mmol),  $\text{Pd}(\text{PPh}_3)_4$  (21 mg, 5 %mol) and 1,3-Dimethylbarbituric acid(68 mg, 1.2 eq). Then the  $\text{CH}_2\text{ClCH}_2\text{Cl}$  (2 mL) was added, the mixture was stirred at 80 °C for 6h. The reaction was quenched with saturated  $\text{NaHCO}_3$  aqueous solution, and the aqueous layer was extracted with  $\text{CH}_2\text{Cl}_2$ . The combined organic layer was washed with saturated  $\text{NaHCO}_3$  aqueous solution and

brine, dried over Na<sub>2</sub>SO<sub>4</sub>, and concentrated in vacuo. The residue was purified by column chromatography to afford 6c (55 mg, 65 %).

**Compound 6c (SiC C):** <sup>1</sup>H NMR (500 MHz, Chloroform-*d*) δ 7.29 (d, *J* = 11.0 Hz, 1H), 7.21 (d, *J* = 8.4 Hz, 1H), 6.74 (d, *J* = 2.6 Hz, 1H), 6.56 (dd, *J* = 8.4, 2.6 Hz, 1H), 5.96 (d, *J* = 10.9 Hz, 1H), 3.32 (s, 1H), 3.23 (q, *J* = 7.2 Hz, 2H), 1.29 (t, *J* = 7.2 Hz, 3H), 0.33 (s, 6H). <sup>13</sup>C NMR (126MHz, Chloroform-*d*) δ 149.19 , 148.87 , 134.41 , 129.39 , 128.04 , 120.16 , 112.44 , 77.16 , 38.14 , 14.75 , -4.04 . HRMS (ESI+ ) Calcd for [M+H]<sup>+</sup> : 232.1152, Found:232.1155

## 2. Photophysical Properties

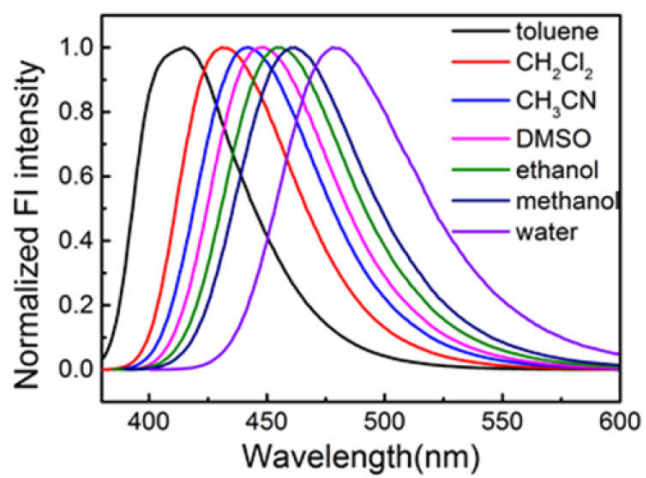

*Figure S1.* Fluorescence spectra of **Coumarin** in different solvents.

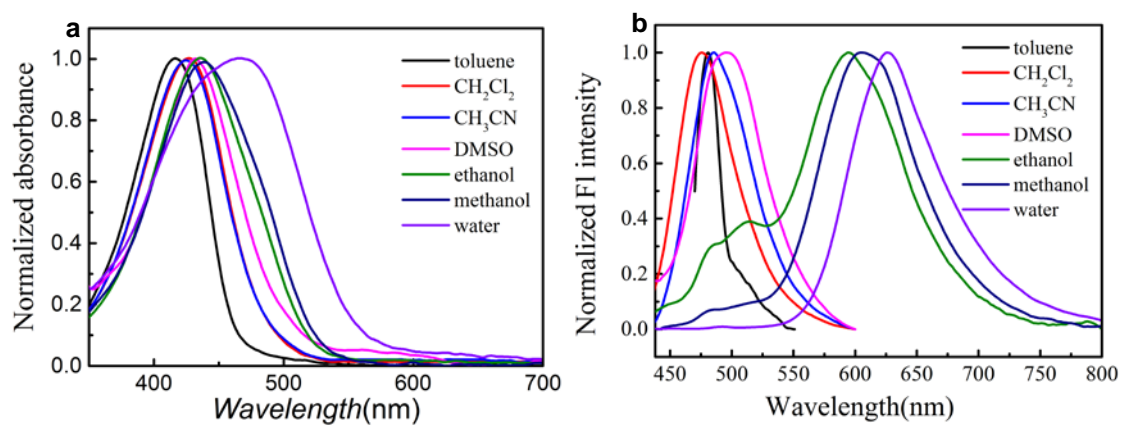

**Figure S2.** (a) UV-vis absorption spectra and (b) fluorescence spectra of **SiC A** (10 μM) in different solvents.

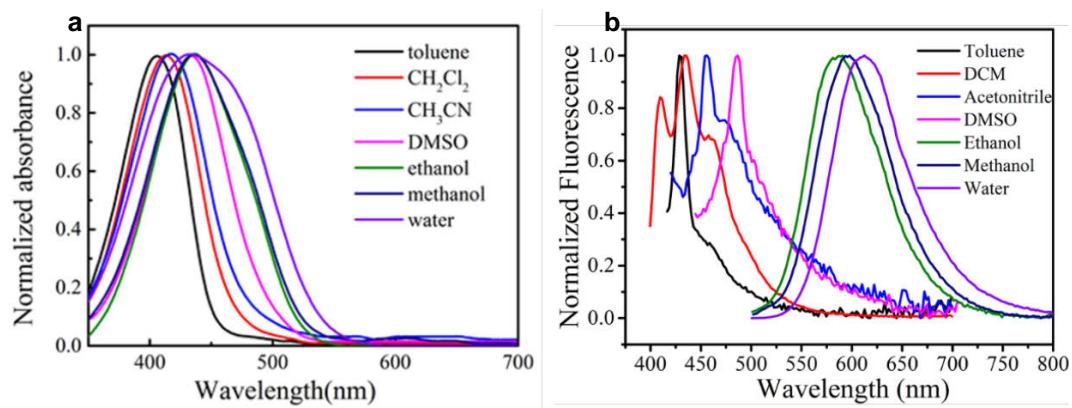

**Figure S3.** (a) UV-vis absorption spectra and (b) fluorescence spectra of SiC C (10 μM) in different solvents.



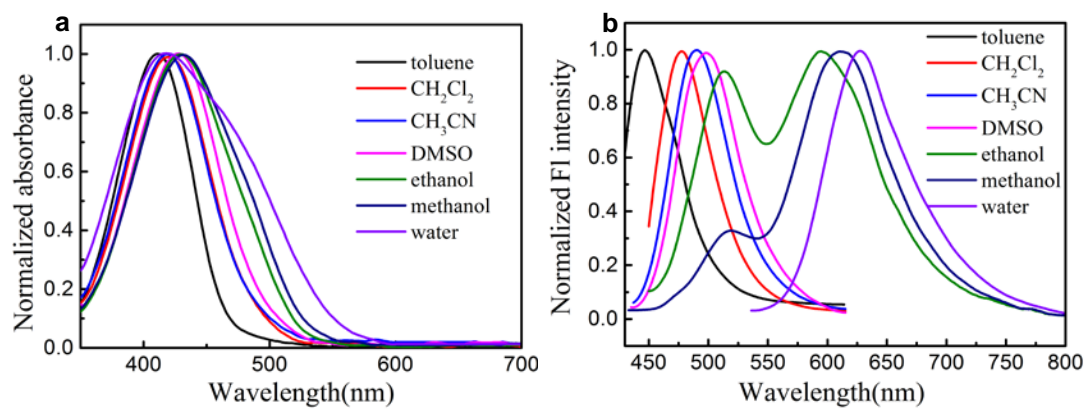

**Figure S4.** (a) UV-vis absorption spectra and (b) fluorescence spectra of **SiC D** (10 μM) in different solvents.

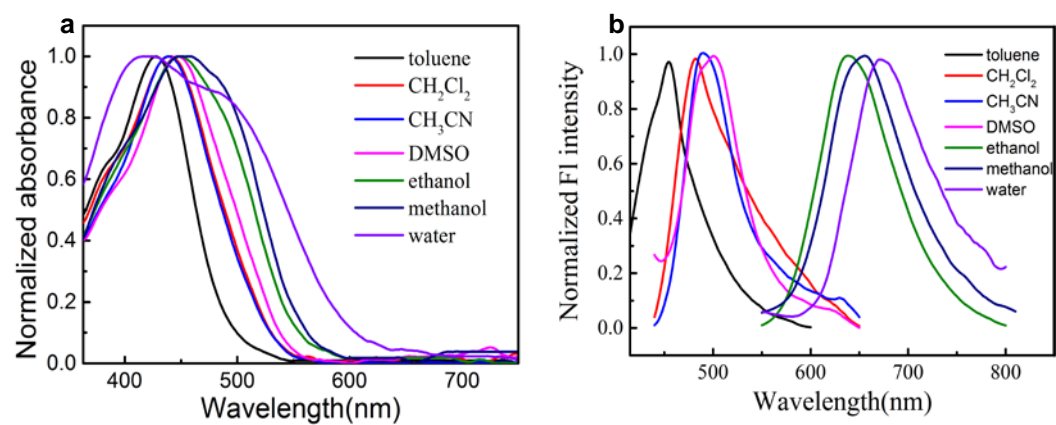

**Figure S5.** (a) UV-vis absorption spectra and (b) fluorescence spectra of **SiC E** (10 μM) in different solvents.

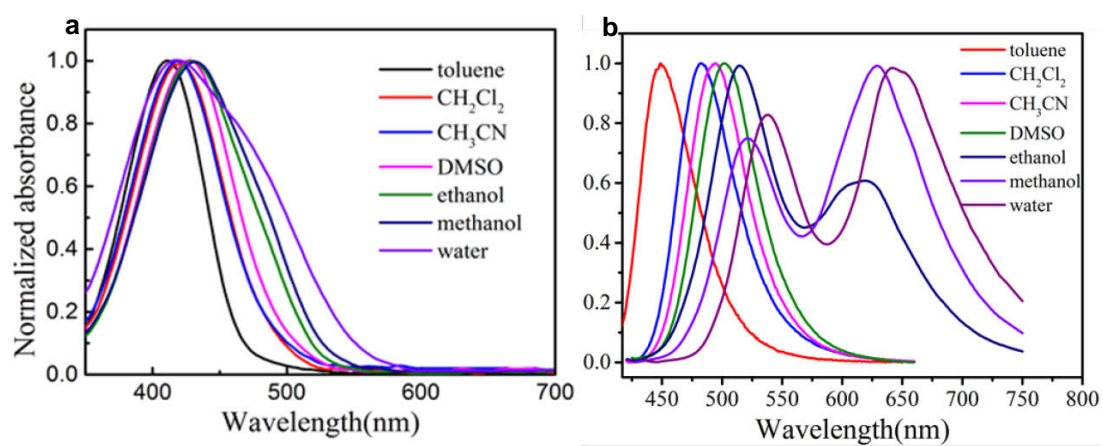

**Figure S6.** (a) UV–vis absorption spectra and (b) fluorescence spectra of **SiC F** (10 μM) in different solvents.

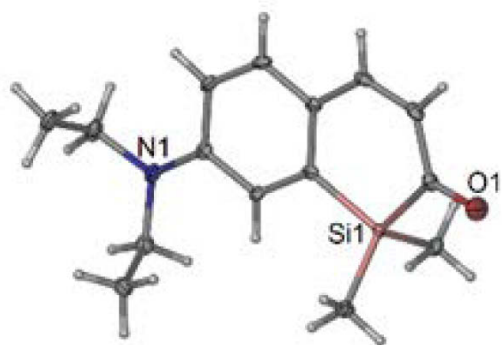

*Figure S7.* The crystal structure of **SiC B**. The CCDC number is 1939522.

**Table S1** Spectroscopic data of Si-coumarins

|              |                                                | Toluene | CH <sub>2</sub> Cl <sub>2</sub> | MeCN  | DMSO  | EtOH  |
|--------------|------------------------------------------------|---------|---------------------------------|-------|-------|-------|
| <b>SiC A</b> | $\lambda_{\text{max}}$ (nm)                    | 417     | 427                             | 426   | 431   | 434   |
|              | $\epsilon$ (M <sup>-1</sup> cm <sup>-1</sup> ) | 10300   | 7200                            | 9300  | 11100 | 10000 |
|              | $\lambda_{\text{em}}$ (nm)                     | 443     | 475                             | 484   | 495   | 594   |
|              | $\Phi$ (%)                                     | 1.0     | 6.0                             | 5.6   | 7.1   | 1.3   |
| <b>SiC B</b> | $\lambda_{\text{max}}$ (nm)                    | 425     | 436                             | 436   | 445   | 445   |
|              | $\epsilon$ (M <sup>-1</sup> cm <sup>-1</sup> ) | 15800   | 16100                           | 19600 | 19500 | 18100 |
|              | $\lambda_{\text{em}}$ (nm)                     | 445     | 480                             | 489   | 497   | 598   |
|              | $\Phi$ (%)                                     | 0.8     | 3.2                             | 1.5   | 4.0   | 2.3   |
| <b>SiC C</b> | $\lambda_{\text{max}}$ (nm)                    | 406     | 414                             | 418   | 434   | 438   |
|              | $\epsilon$ (M <sup>-1</sup> cm <sup>-1</sup> ) | 12300   | 10500                           | 9300  | 13000 | 9500  |
|              | $\lambda_{\text{em}}$ (nm)                     | 430     | 434                             | 456   | 482   | 590   |
|              | $\Phi$ (%)                                     | 0.3     | 3.1                             | 1.0   | 5.0   | 2.1   |
| <b>SiC D</b> | $\lambda_{\text{max}}$ (nm)                    | 413     | 420                             | 419   | 427   | 428   |
|              | $\epsilon$ (M <sup>-1</sup> cm <sup>-1</sup> ) | 10900   | 5700                            | 9500  | 10500 | 11000 |
|              | $\lambda_{\text{em}}$ (nm)                     | 446     | 470                             | 491   | 499   | 599   |
|              | $\Phi$ (%)                                     | 0.6     | 3.1                             | 1.0   | 5.4   | 2.0   |
| <b>SiC E</b> | $\lambda_{\text{max}}$ (nm)                    | 429     | 441                             | 440   | 448   | 446   |
|              | $\epsilon$ (M <sup>-1</sup> cm <sup>-1</sup> ) | 7200    | 4800                            | 6600  | 6231  | 3147  |
|              | $\lambda_{\text{em}}$ (nm)                     | 454     | 483                             | 488   | 501   | 638   |
|              | $\Phi$ (%)                                     | 2.3     | 4.5                             | 1.9   | 12    | 3.6   |
| <b>SiC F</b> | $\lambda_{\text{max}}$ (nm)                    | 429     | 441                             | 438   | 447   | 449   |
|              | $\epsilon$ (M <sup>-1</sup> cm <sup>-1</sup> ) | 10400   | 8900                            | 8600  | 10800 | 10200 |
|              | $\lambda_{\text{em}}$ (nm)                     | 449     | 481                             | 494   | 502   | 622   |
|              | $\Phi$ (%)                                     | 1.1     | 4.6                             | 5.5   | 5.0   | 5.2   |

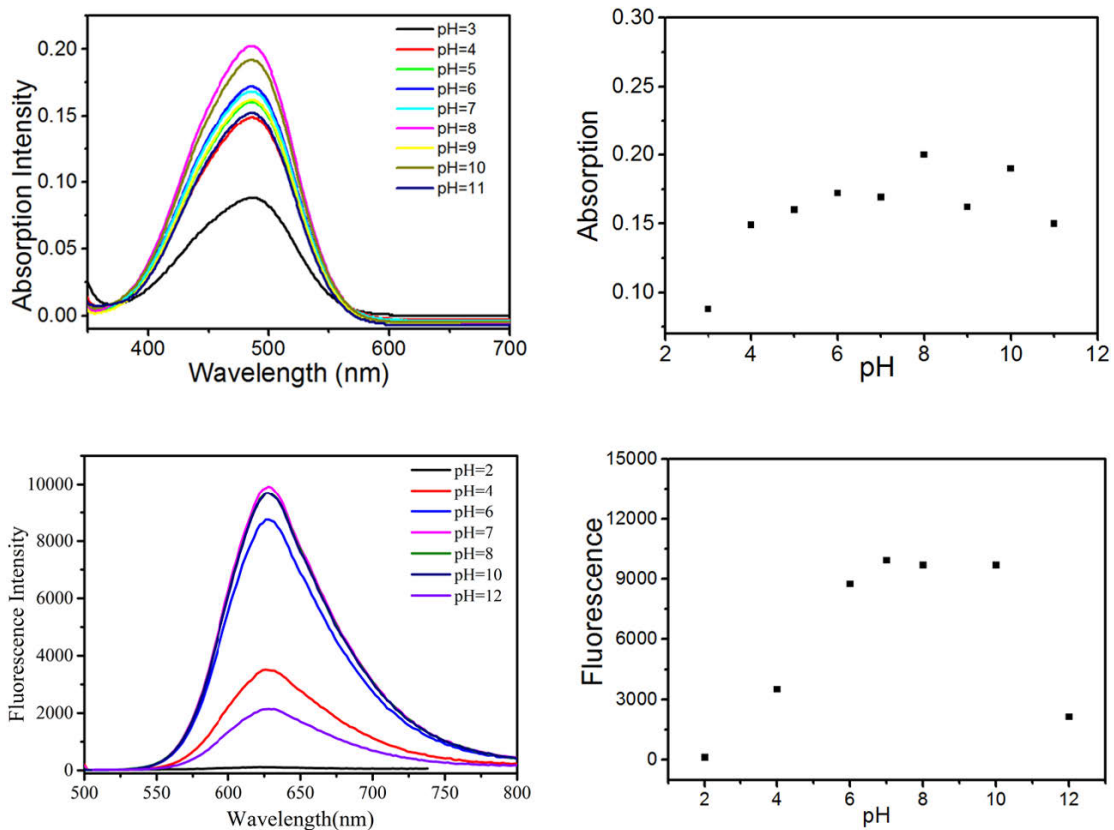

**Figure S8.** Absorption and fluorescence spectra of SiC B in various pH.

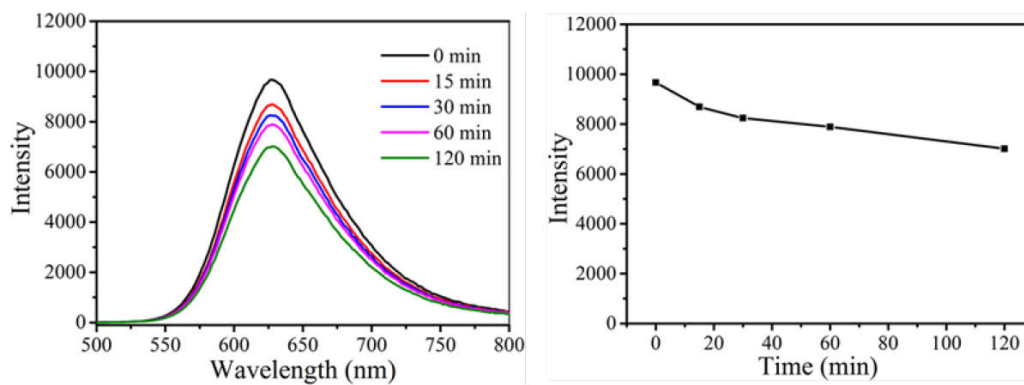

**Figure S9.** Photostability of **SiC B**. Fluorescence spectra of **SiC B** after continuous irradiation.

### 3. Biological experiment

#### MTT assay for the evaluation of cytotoxicity.

MTT assay was performed to evaluate the cytotoxicity of **SiC B**, HeLa cells were seeded into a 96- well plate and incubated in Dulbecco's Modified Eagle's Medium (DMEM) containing various concentration of **SiC B** (0, 0.1, 1, 2, 5, 10  $\mu\text{M}$ ) at 37 °C for 24 h. MTT reagent 3-(4,5-dimethylthiazol-2-yl)-2,5-diphenyltetrazolium bromide was added to each well, the plates were incubated for another 4 h in a 5% CO<sub>2</sub> / 95% air incubator. DMSO were added to each well to dissolve the formazan, the absorbance of each well was at wavelength of 540 nm.

#### Culture and white adipogenic differentiation of 3T3-L1 cells.

The mesenchymal stem cell line 3T3-L1 were cultured in DMEM containing 10% fetal bovine serum (FBS) and 1% AA at 37 °C in a 5% CO<sub>2</sub>/95% air incubator. After the cells become overgrown, they were cultured for another two days before the addition of differentiation inducers in the DMEM. The cells were cultured with DMEM containing 10% FBS, 50 ng/ml insulin, 0.5 mM IBMX (3-Isobutyl-1-methylxanthine) and 5  $\mu\text{M}$  Dex (dexamethasone) for 2 days. Cells were then changed to the maintenance media of DMEM containing 10% FBS supplemented with 5 ng/ml insulin. The cells were incubated with **SiC B** (5  $\mu\text{M}$ ) for 30 mins before washed with PBS for three times for confocal experiments.

#### Culture and brown adipogenic differentiation of C3H10T1/2 cells.

The mesenchymal stem cell line *C3H10T1/2* were cultured in DMEM (Invitrogen 12430) containing 10% fetal bovine serum (FBS, Gibco) and 1% Antibiotic-Antimycotic (AA, Sigma) at 37 °C in a 5% CO<sub>2</sub> / 95% air incubator. After the cells grew to confluency, brown adipogenic differentiation were induced in the media of DMEM containing 10% FBS, 50 ng/mL insulin, 1  $\mu\text{M}$  Rosi (rosiglitazone), 50 nM T3 (3,3',5-Triiodo-L-Thyronine), 0.5 mM IBMX (3-Isobutyl-1-methylxanthine), 5  $\mu\text{M}$  Dex (dexamethasone) and 125 nM Indo (indomethacin) for 2 days. Cells were then changed to the maintenance media of DMEM containing 10% FBS supplemented with 1  $\mu\text{M}$  rosiglitazone, 5 ng/ml insulin and 50 nM T3. The differentiation process was monitored by confocal microscope on the first, third and eighth days of differentiation. The cells were incubated with **SiC B** (5  $\mu\text{M}$ ) for 30 mins before washed with PBS for three times for confocal experiments.



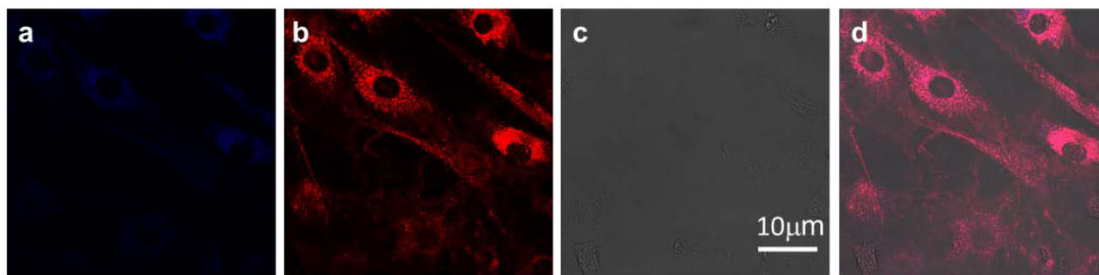

**Figure S10.** *C3H10T1/2* cells, stained with 5µm **SiC B** before the adipogenic differentiation process.

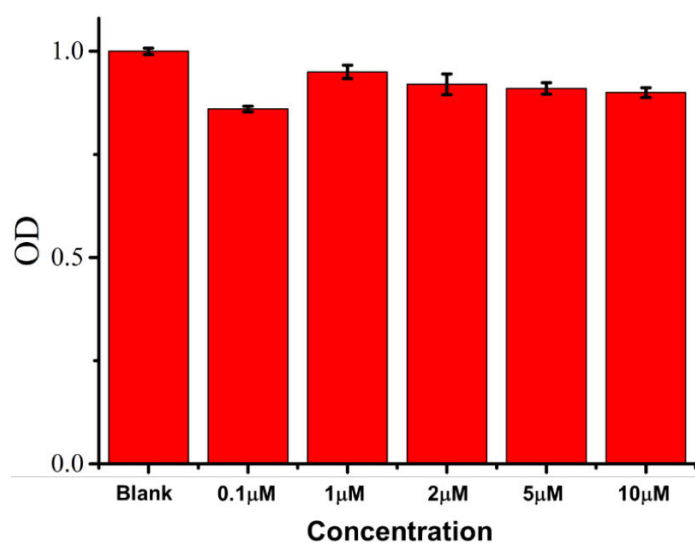

*Figure S11.* Cell viability results of the HeLa cells with **SiC B** by MTT assay. All data are presented as mean  $\pm$  standard deviation (n = 3).

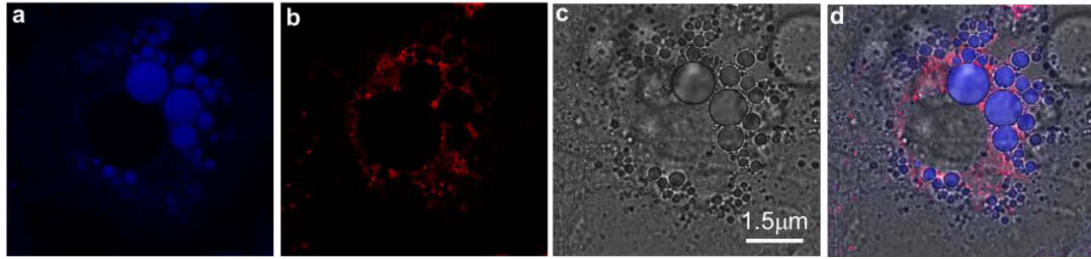

**Figure S12.** Confocal microphotographs of 3T3-L1 preadipocytes. (a) (b) fluorescence image,  $\lambda_{\text{ex}} = 405 \text{ nm}$ ,  $\lambda_{\text{em}} = 420 - 490 \text{ nm}$  for **a**,  $\lambda_{\text{em}} = 530 - 630 \text{ nm}$  for **b**; (c) phase image; (d) merged image of **a**, **b** and **c**.

## 4. Theoretical calculations

**Computational Method.** Geometry optimizations and TDDFT were performed at the B3LYP/6-31G(d) level in vacuum by Gaussian 16 program. In the TDDFT calculation, 50 excited states were calculated for each fluorophore.

**Table S2.** HOMO, LUMO energy level, the energy gap between HOMO and LUMO ( $\Delta E$ ), frontier molecular orbital overlap indexes ( $\lambda$ ), molecular orbitals of HOMO and LUMO for **SiC A-F**, O-coumarin and C-coumarin in Vacuo

|                       | 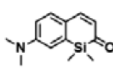   |    |    |    |    |     |    |    |
|-----------------------|-------------------------------------------------------------------------------------|-------------------------------------------------------------------------------------|-------------------------------------------------------------------------------------|-------------------------------------------------------------------------------------|-------------------------------------------------------------------------------------|---------------------------------------------------------------------------------------|---------------------------------------------------------------------------------------|---------------------------------------------------------------------------------------|
| <b>LUMO</b><br>(a.u.) | -0.0620                                                                             | -0.0627                                                                             | -0.0625                                                                             | -0.0627                                                                             | -0.0633                                                                             | -0.0614                                                                               | -0.0505                                                                               | -0.0530                                                                               |
| <b>HOMO</b><br>(a.u.) | -0.192                                                                              | -0.192                                                                              | -0.195                                                                              | -0.193                                                                              | -0.190                                                                              | -0.189                                                                                | -0.1974                                                                               | -0.191                                                                                |
| $\Delta E$ (ev)       | 3.52                                                                                | 3.52                                                                                | 3.62                                                                                | 3.54                                                                                | 3.46                                                                                | 3.46                                                                                  | 4.00                                                                                  | 3.73                                                                                  |
| $\Delta E$ (nm)       | 352                                                                                 | 353                                                                                 | 344                                                                                 | 350                                                                                 | 359                                                                                 | 359                                                                                   | 311                                                                                   | 333                                                                                   |
| $\lambda$             | 0.646                                                                               | 0.639                                                                               | 0.659                                                                               | 0.652                                                                               | 0.644                                                                               | 0.640                                                                                 | 0.671                                                                                 | 0.634                                                                                 |
| <b>LUMO</b>           |  |  |  |  |  |  |  |  |
| <b>HOMO</b>           |  |  |  |  |  |  |  |  |

**Table S3.** TDDFT results for the oscillator strength ( $f$ ) of the major excited state and the contribution of HOMO $\rightarrow$ LUMO to the excited state.

|              | 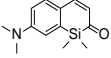 |  |  |  |  |  |  |  |
|--------------|-----------------------------------------------------------------------------------|-----------------------------------------------------------------------------------|-----------------------------------------------------------------------------------|-----------------------------------------------------------------------------------|-----------------------------------------------------------------------------------|-------------------------------------------------------------------------------------|-------------------------------------------------------------------------------------|-------------------------------------------------------------------------------------|
| $f$          | 0.2892                                                                            | 0.3124                                                                            | 0.2969                                                                            | 0.3092                                                                            | 0.2425                                                                            | 0.2605                                                                              | 0.4366                                                                              | 0.3527                                                                              |
| Contribution | 0.9759                                                                            | 0.9721                                                                            | 0.9706                                                                            | 0.9753                                                                            | 0.9771                                                                            | 0.9764                                                                              | 0.9667                                                                              | 0.9445                                                                              |

## 5. NMR and HRMS Spectra

### Compound 2a-5a:

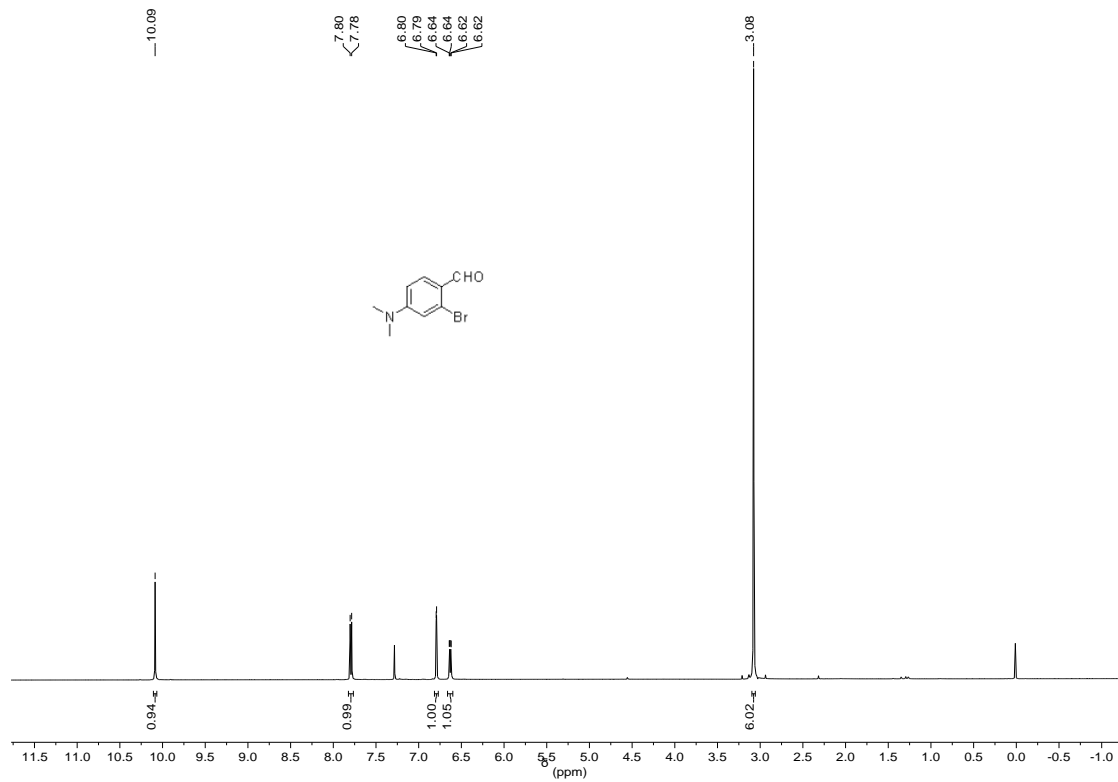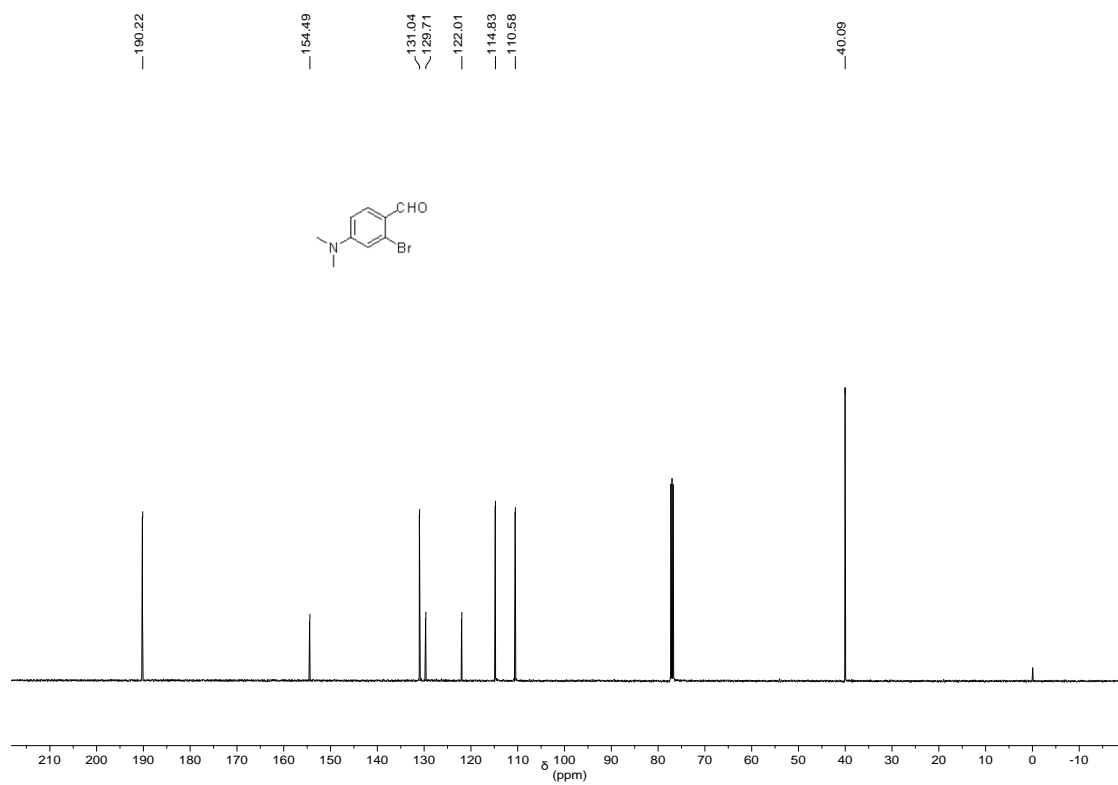

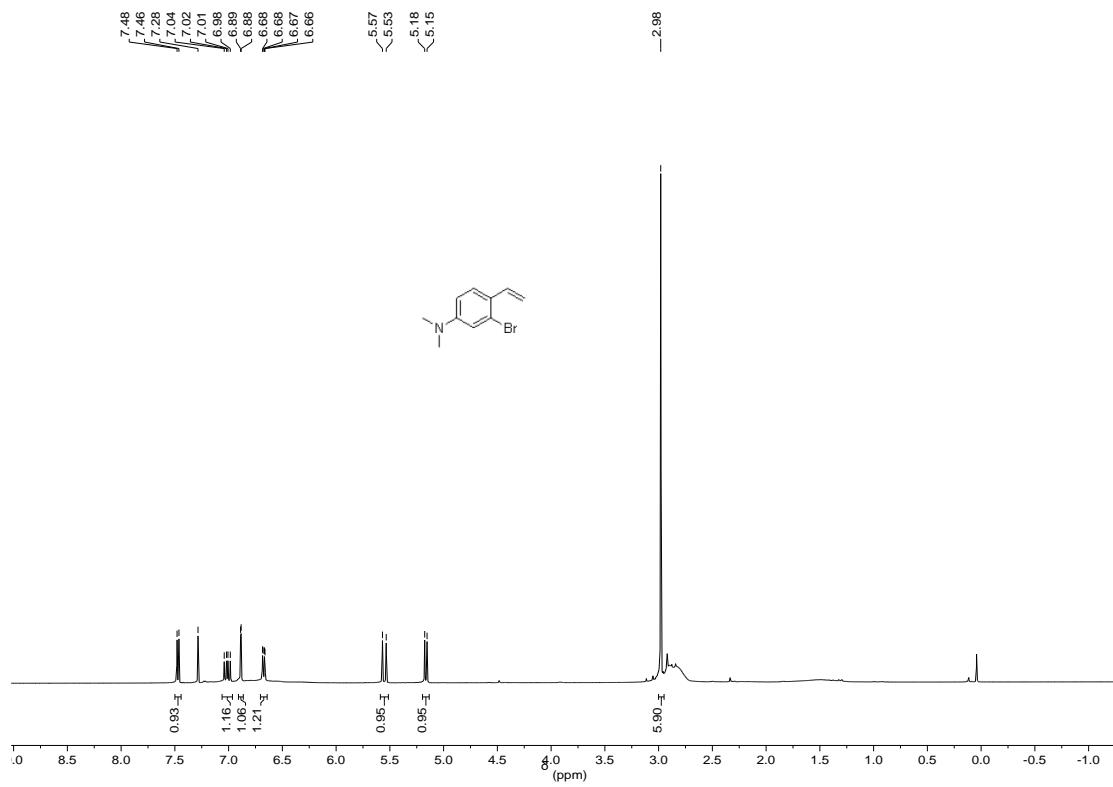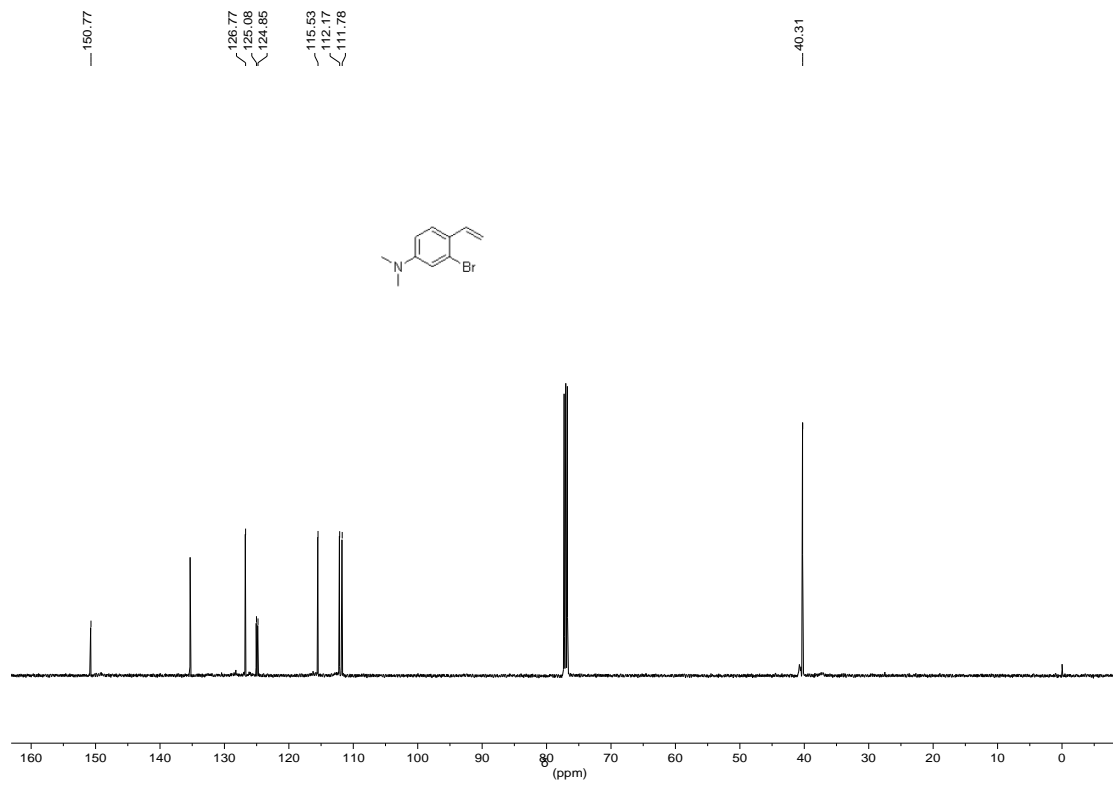

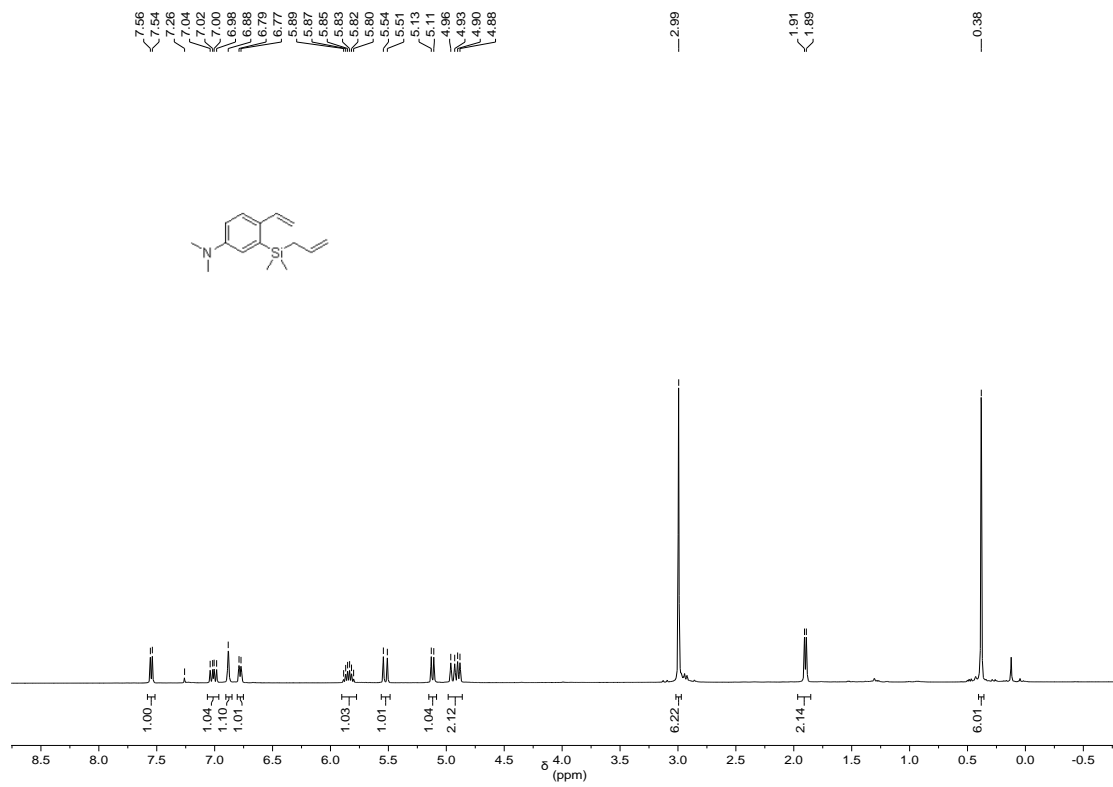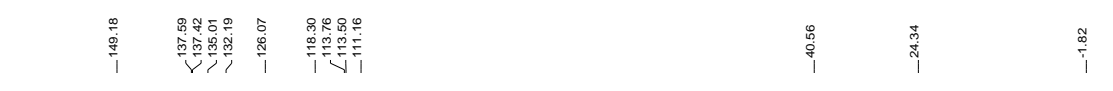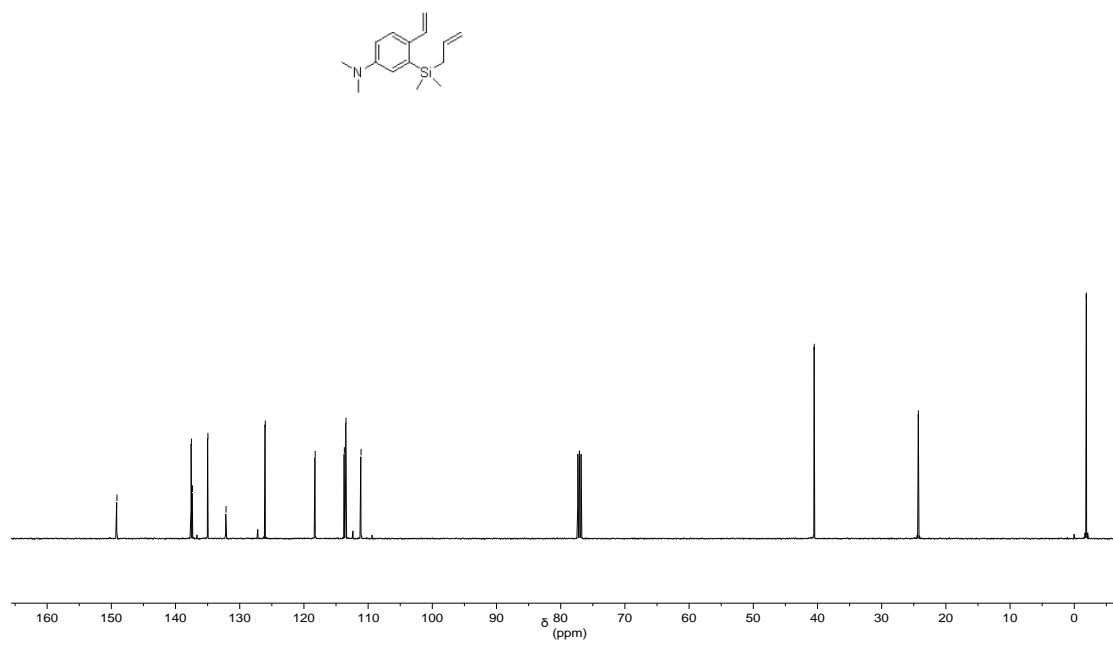



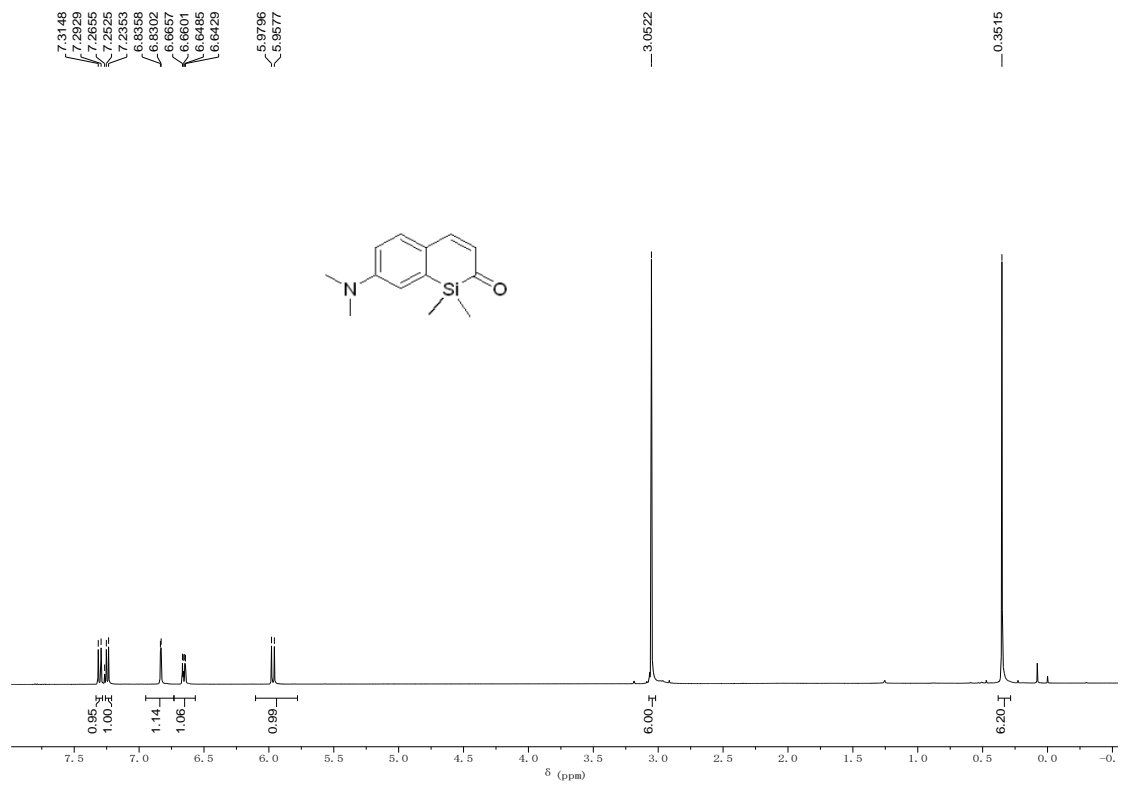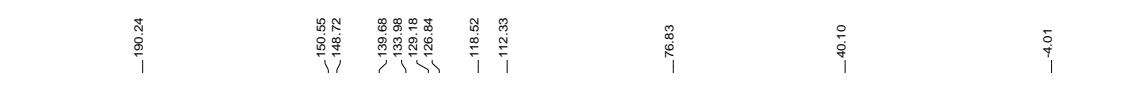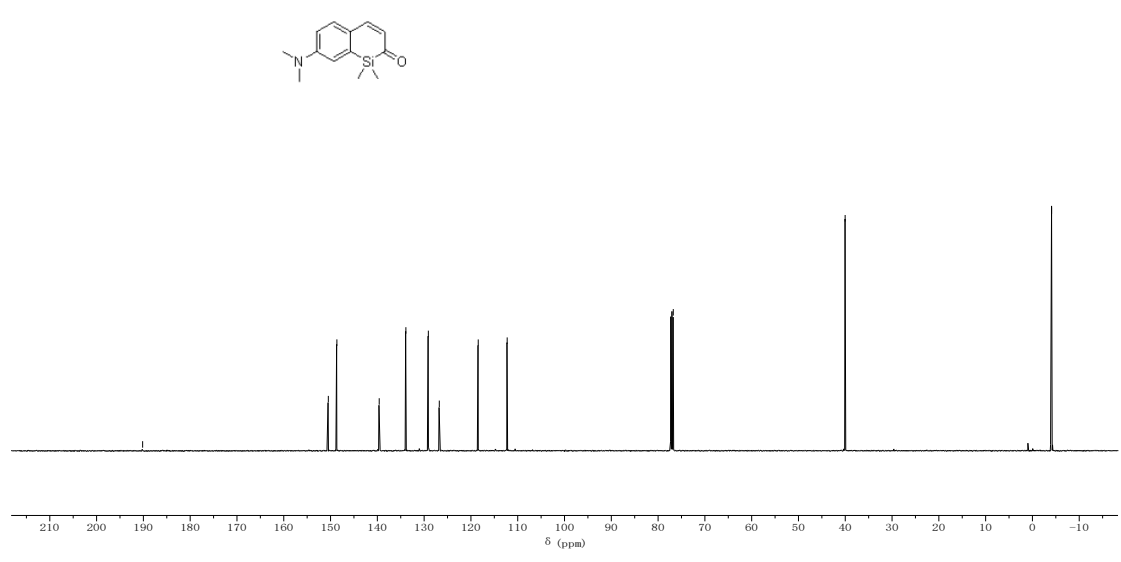

**Compound 2b-5b:**

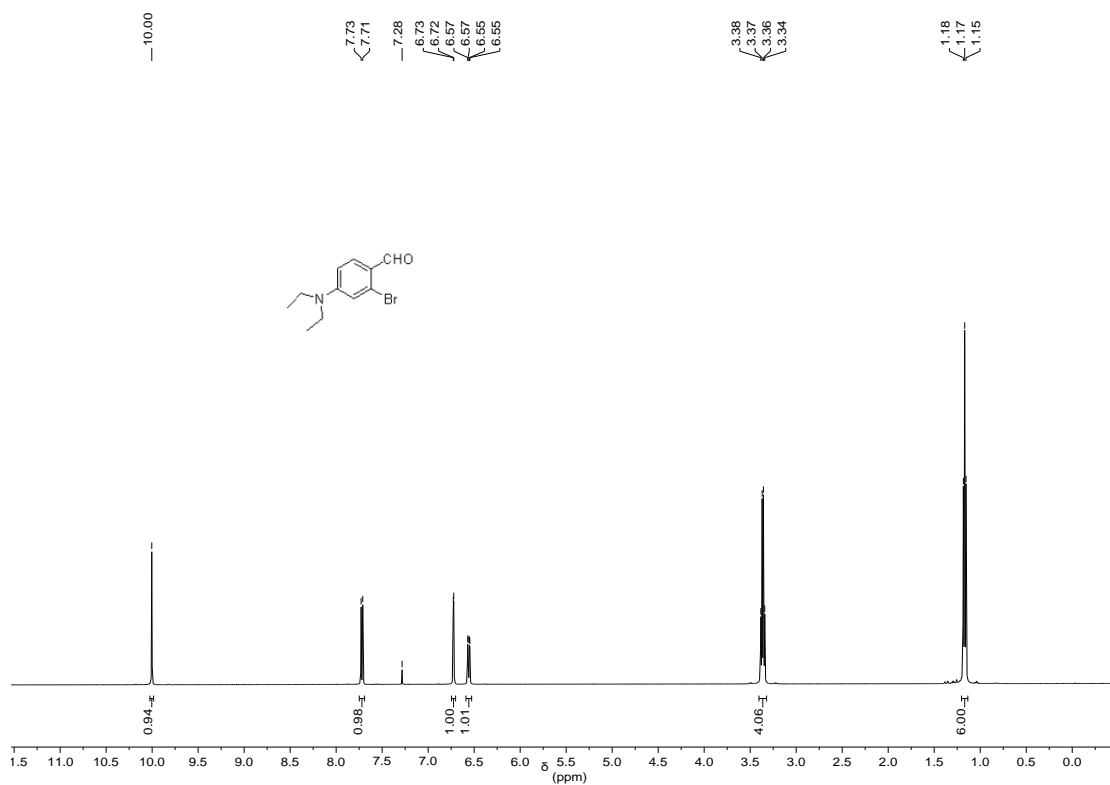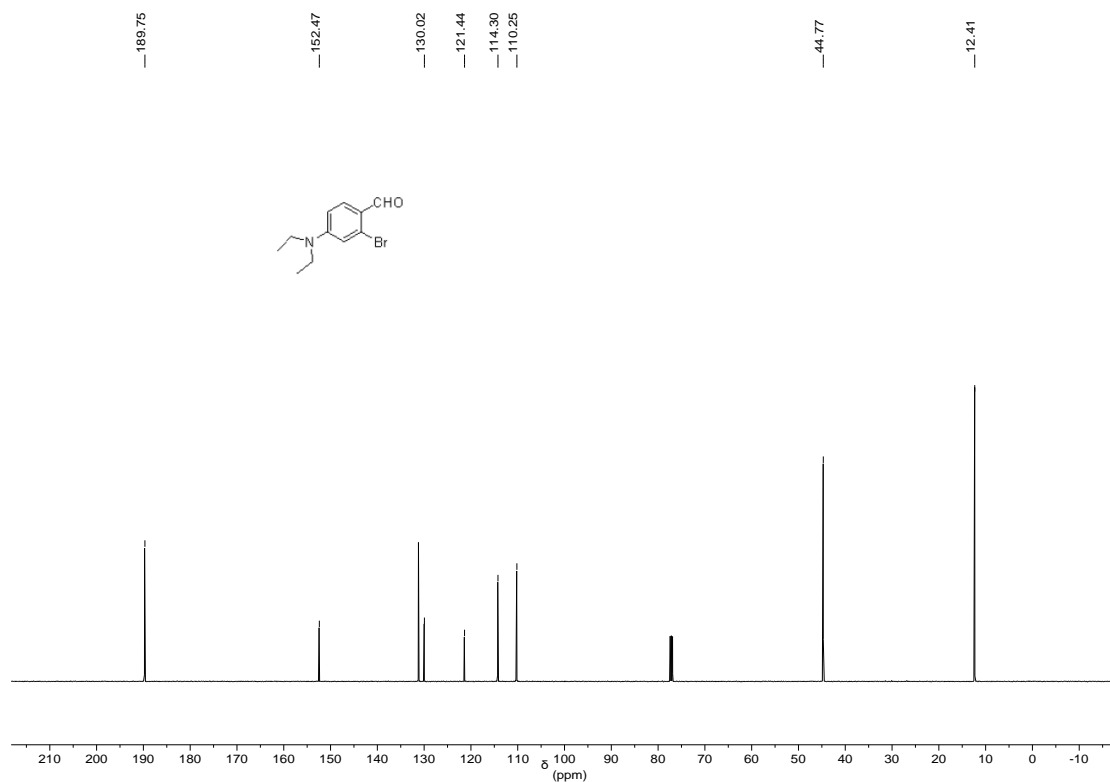

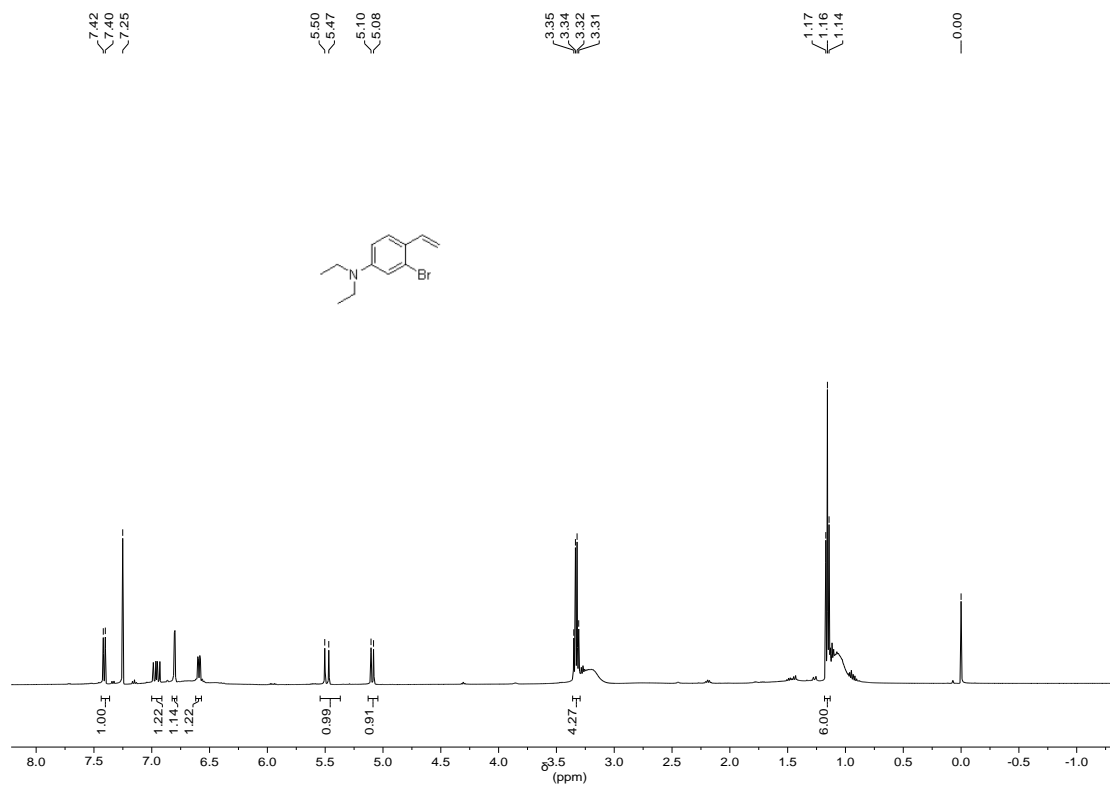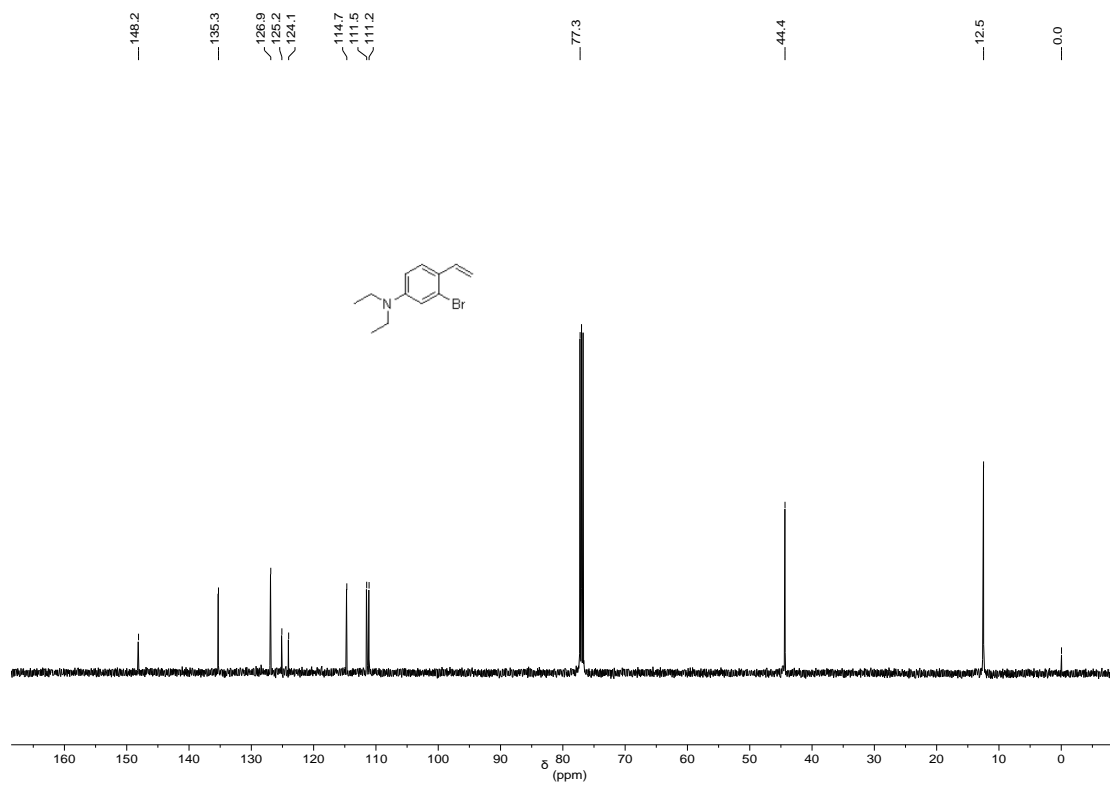

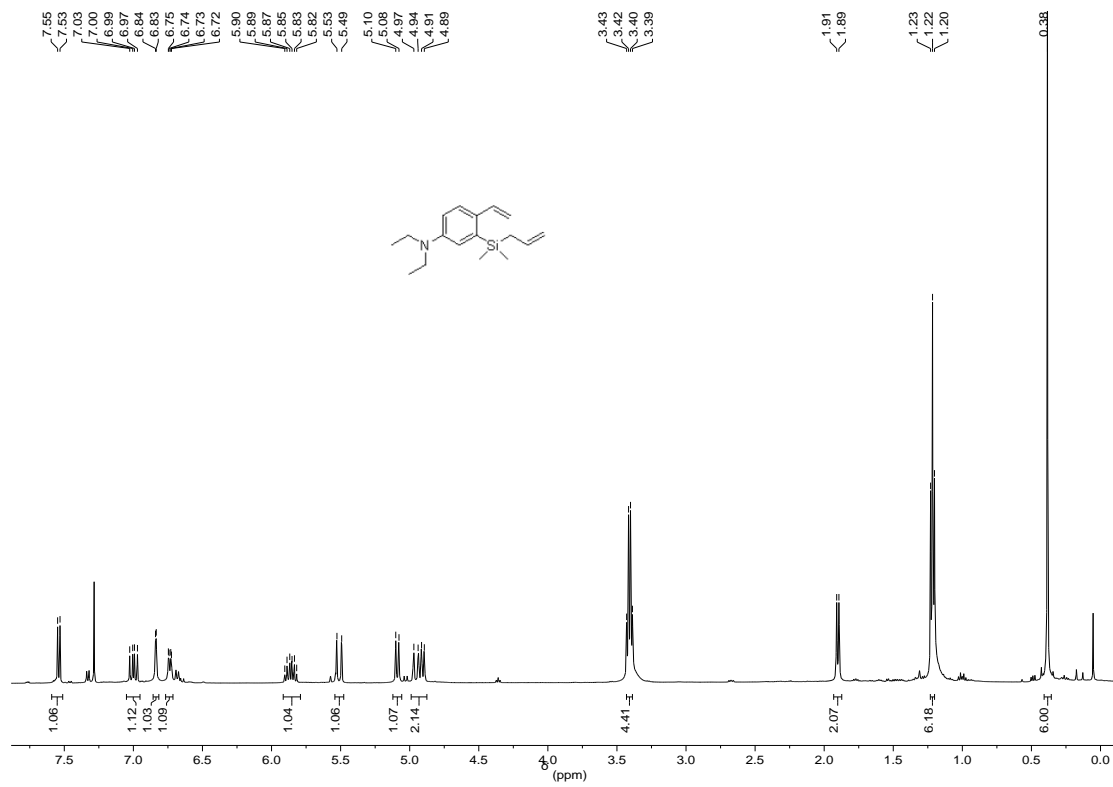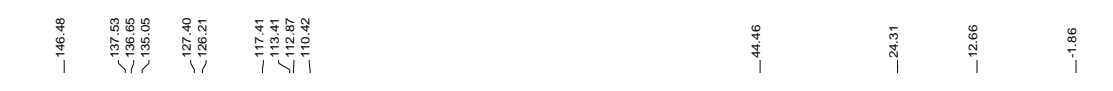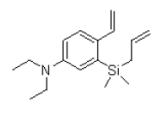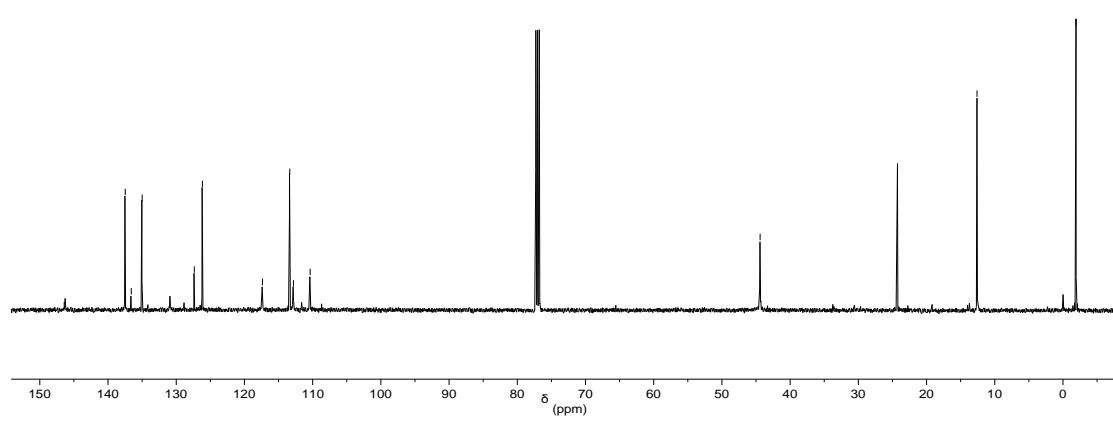

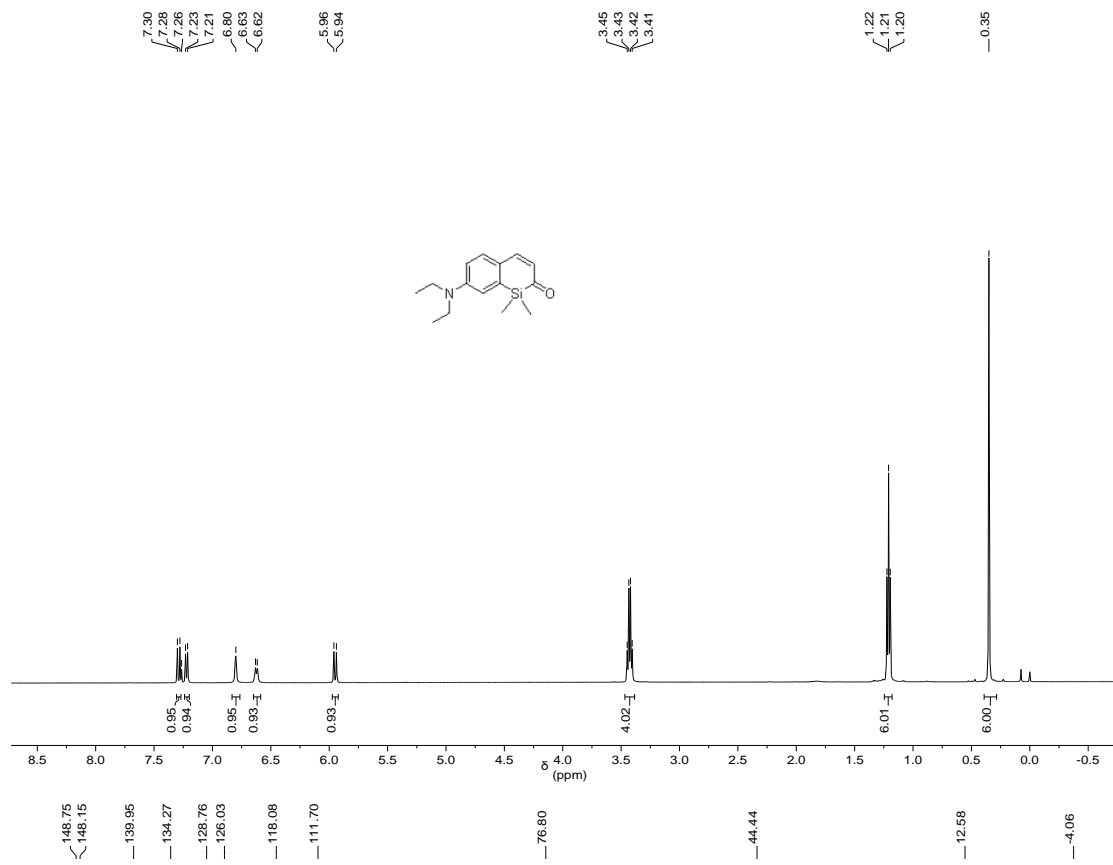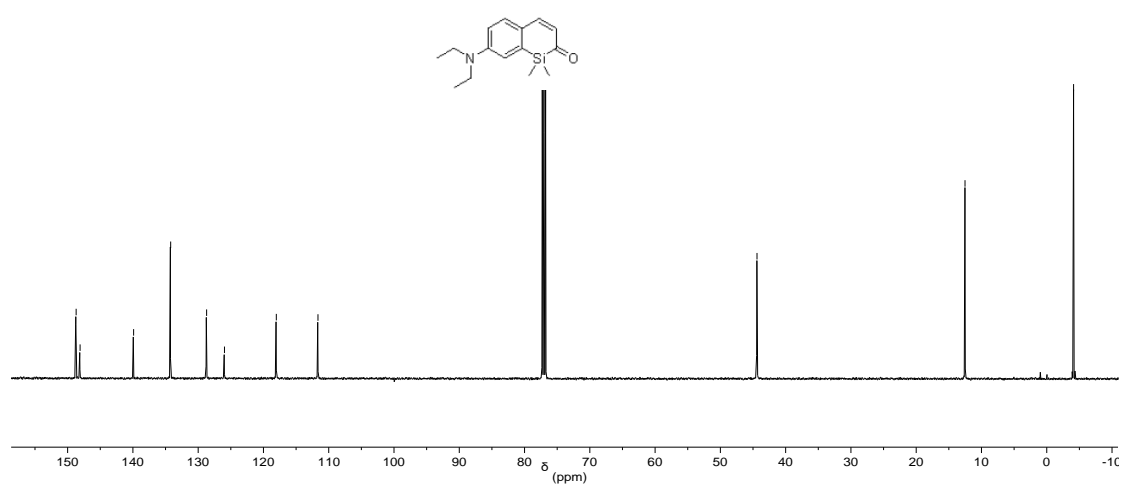

### Compound 2c-6c:

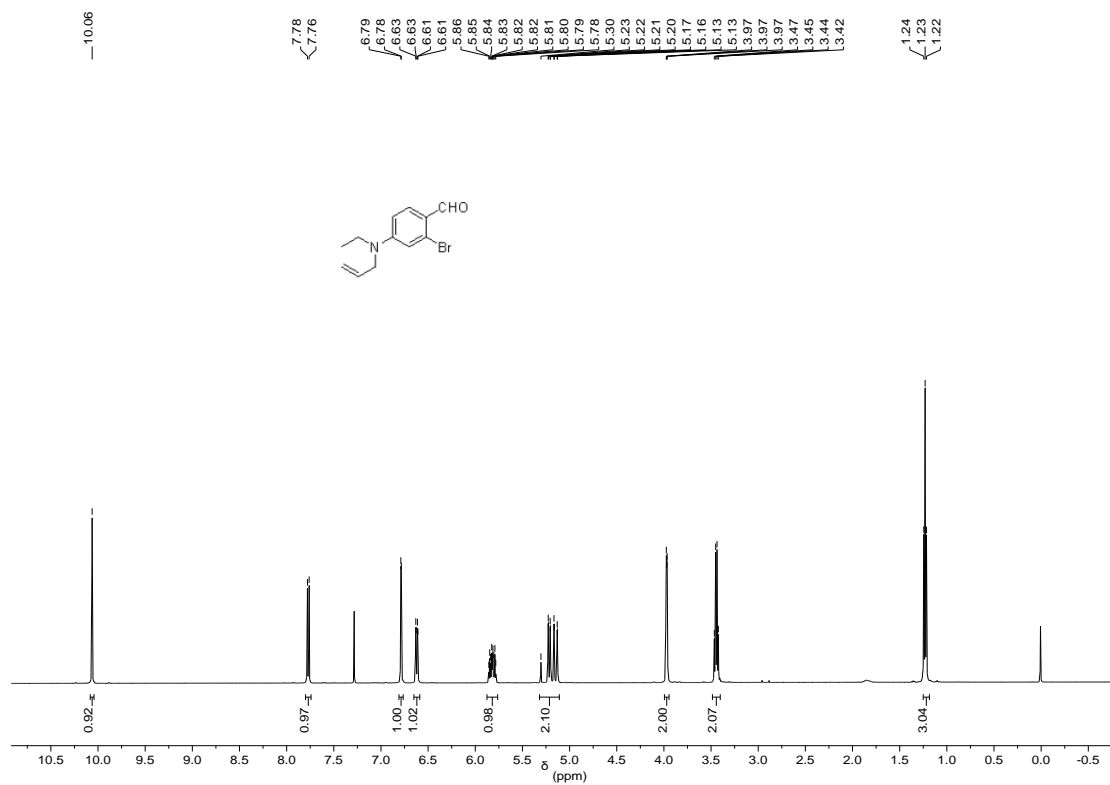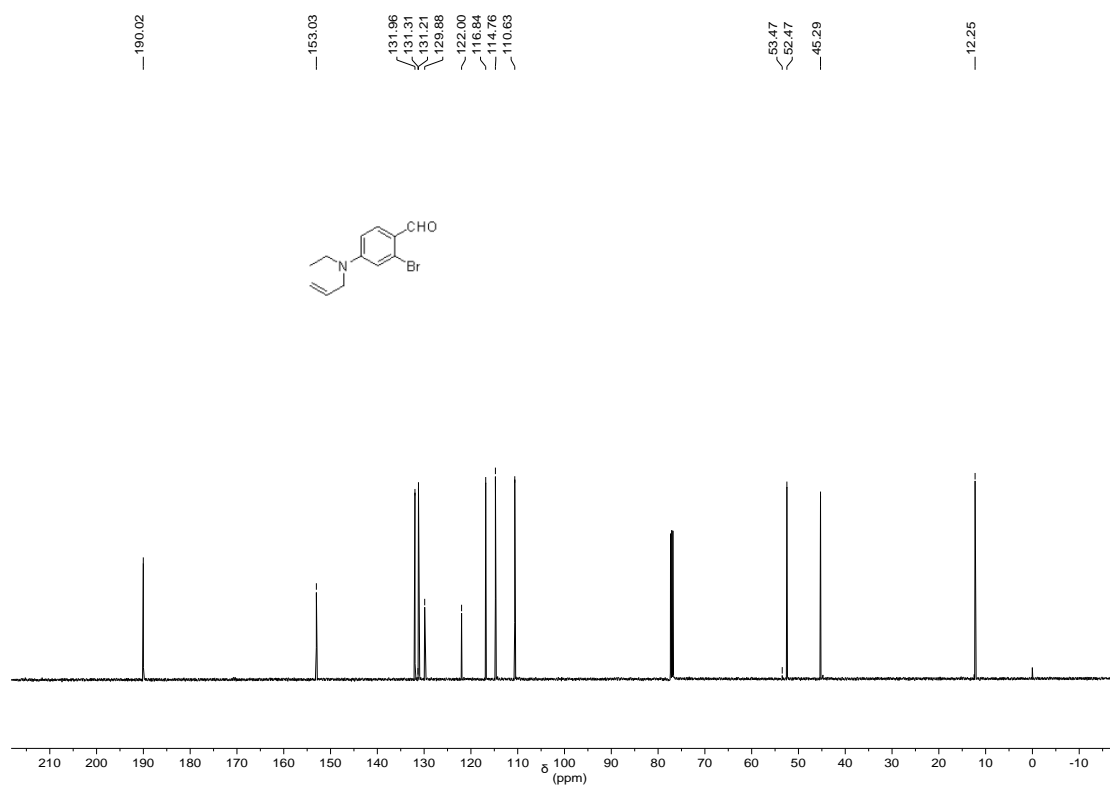

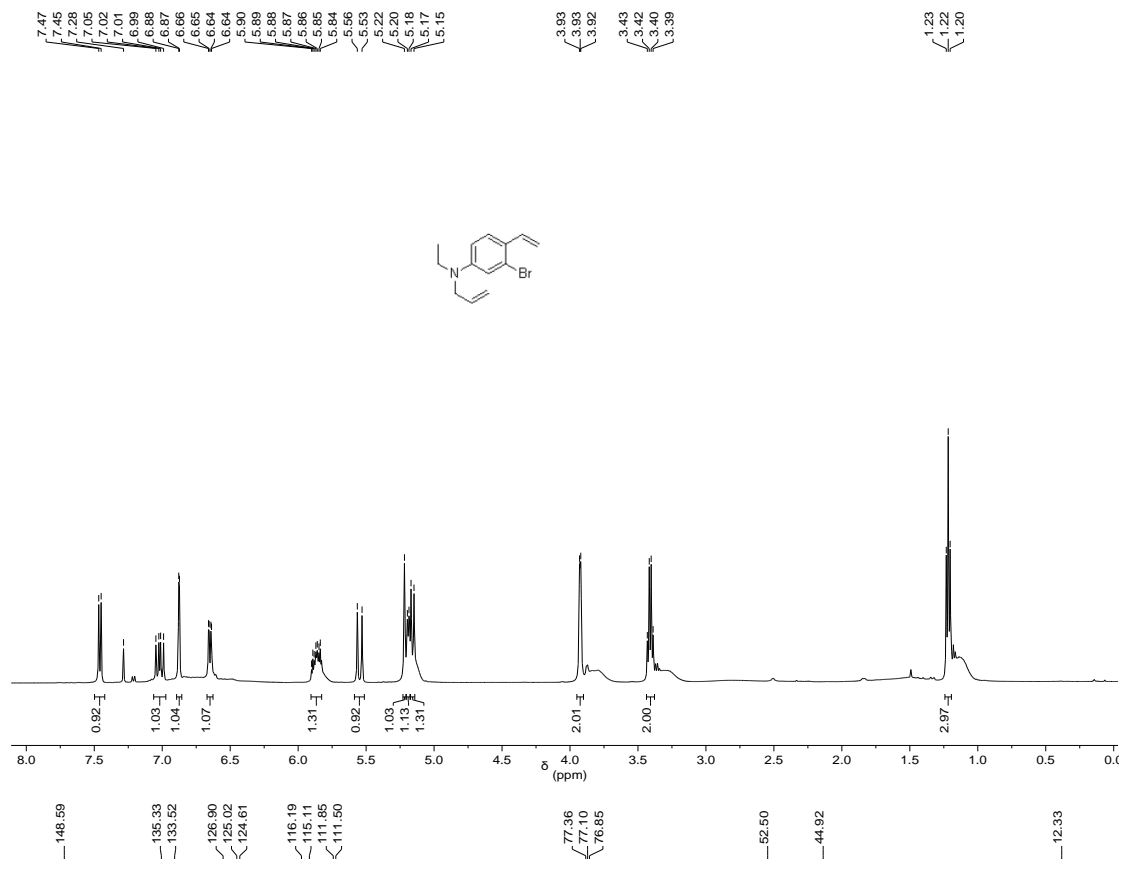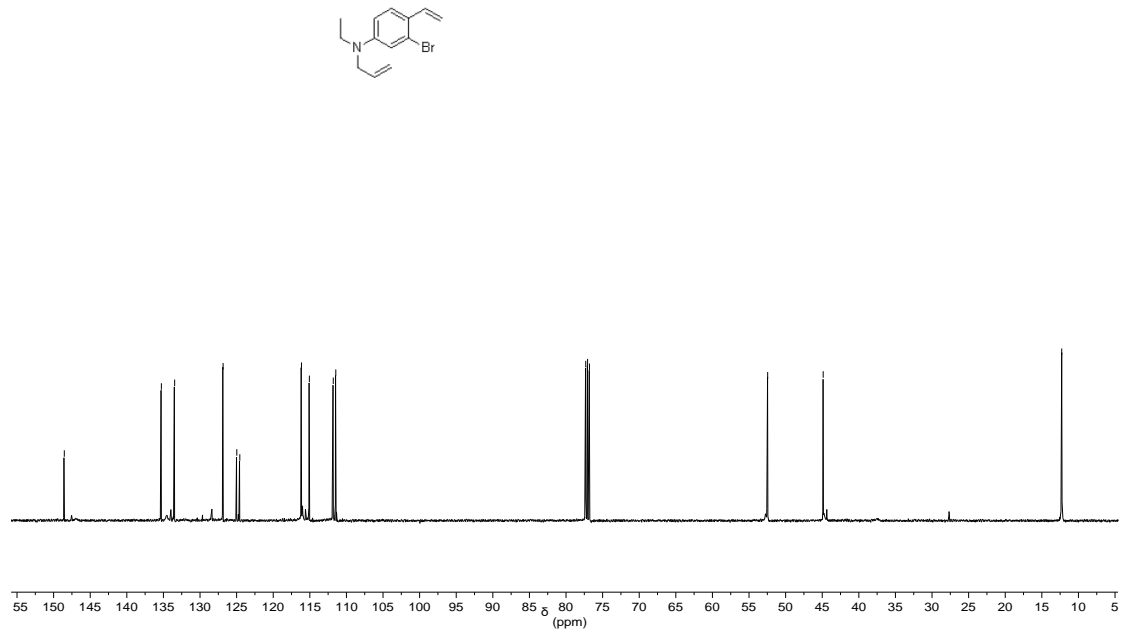





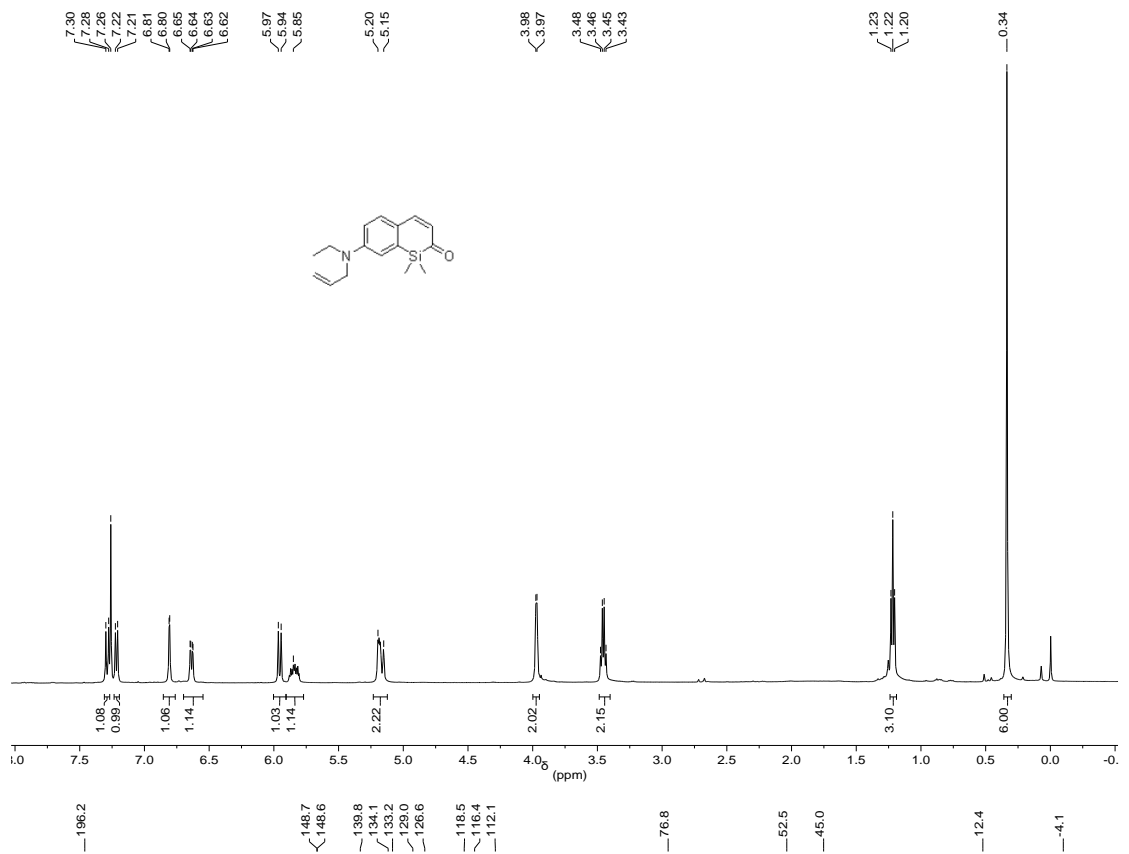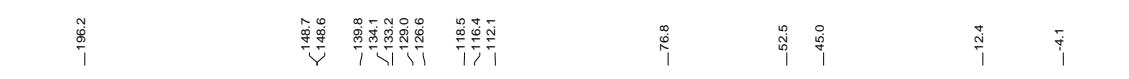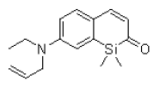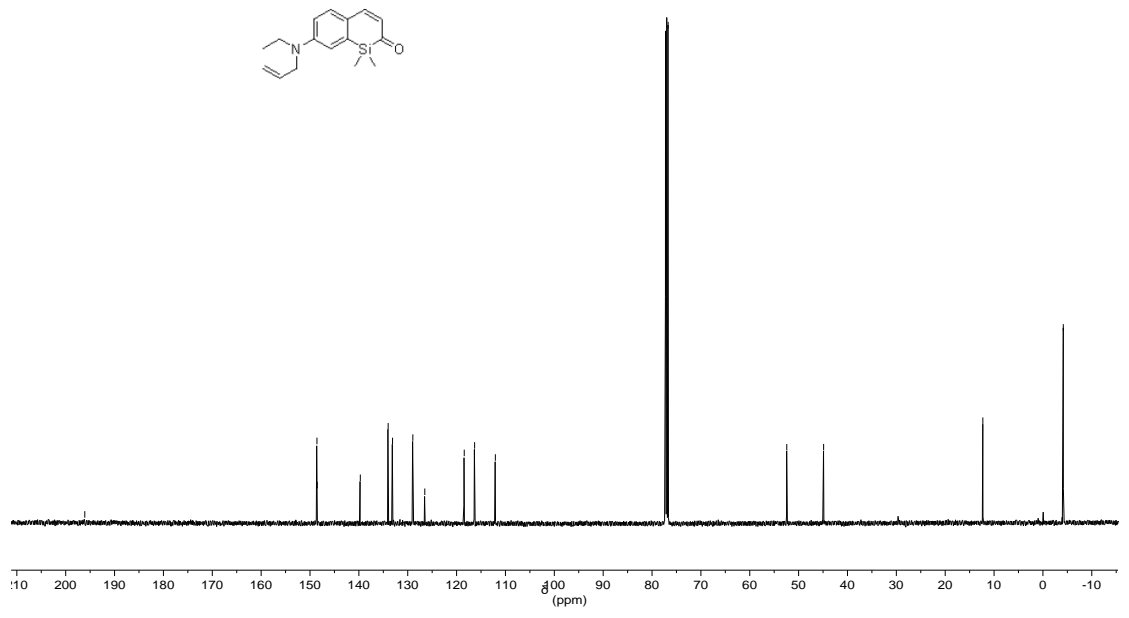

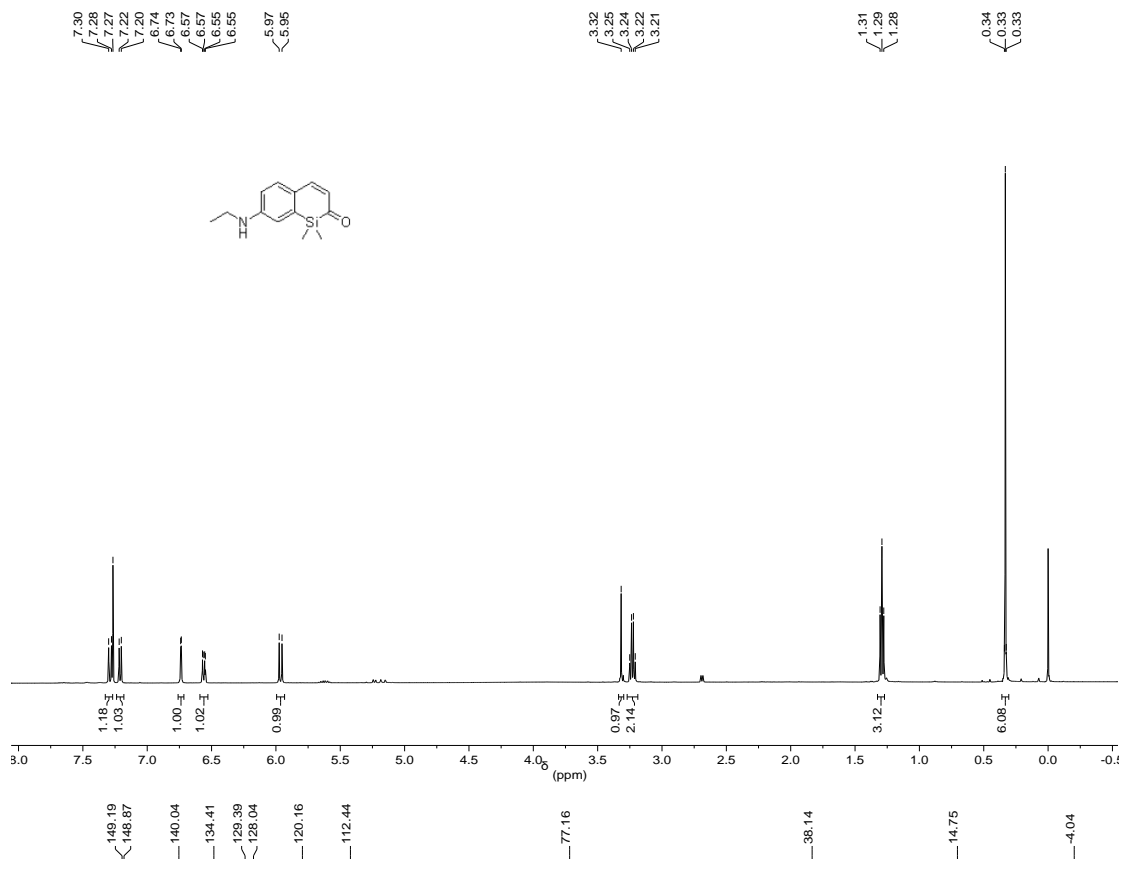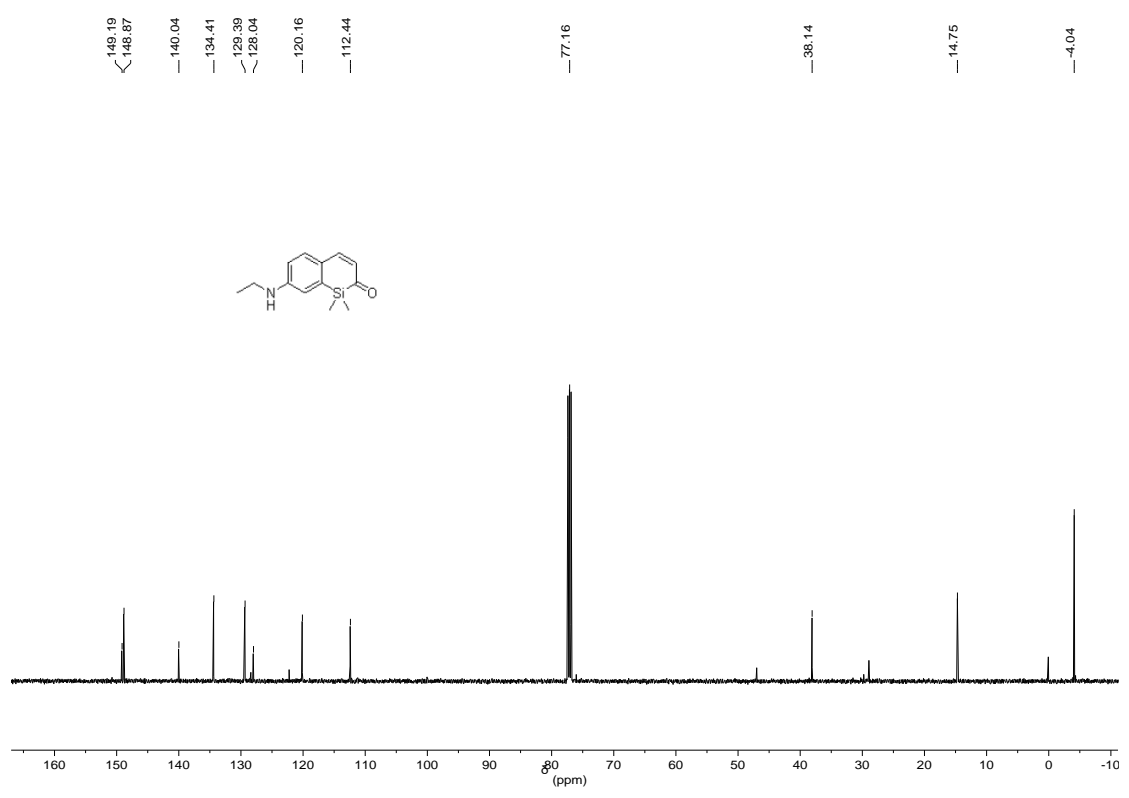

Compound 2d-5d:

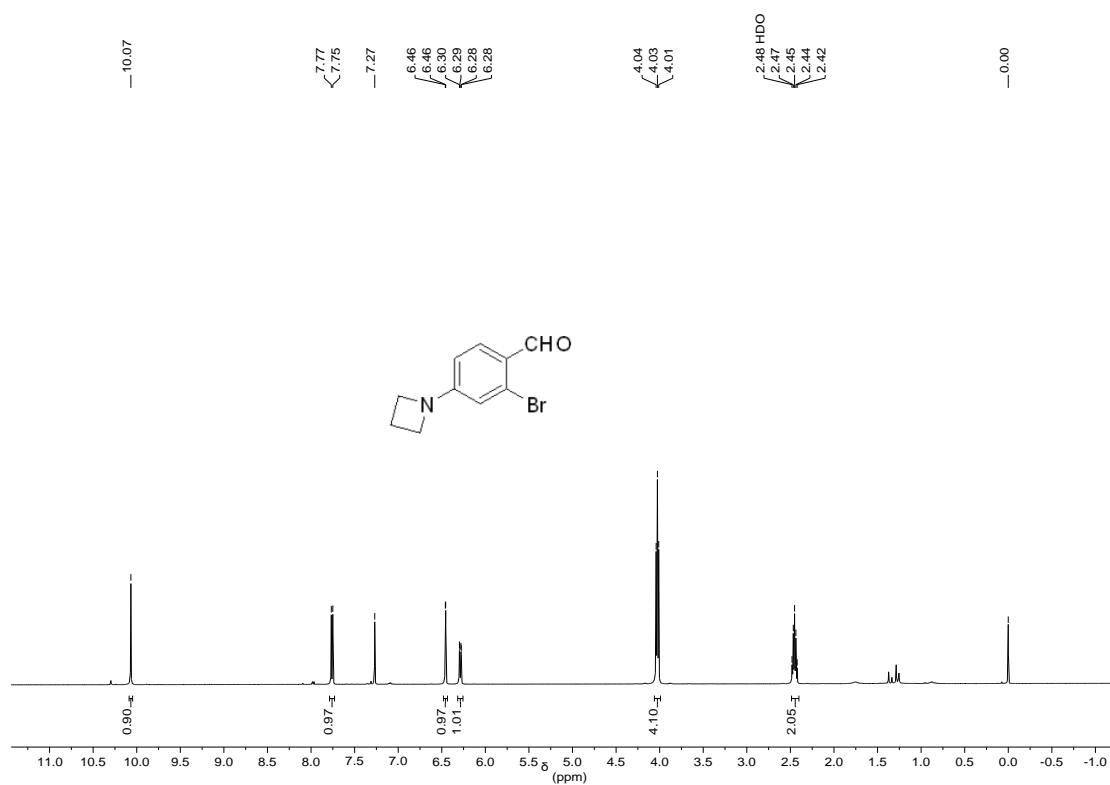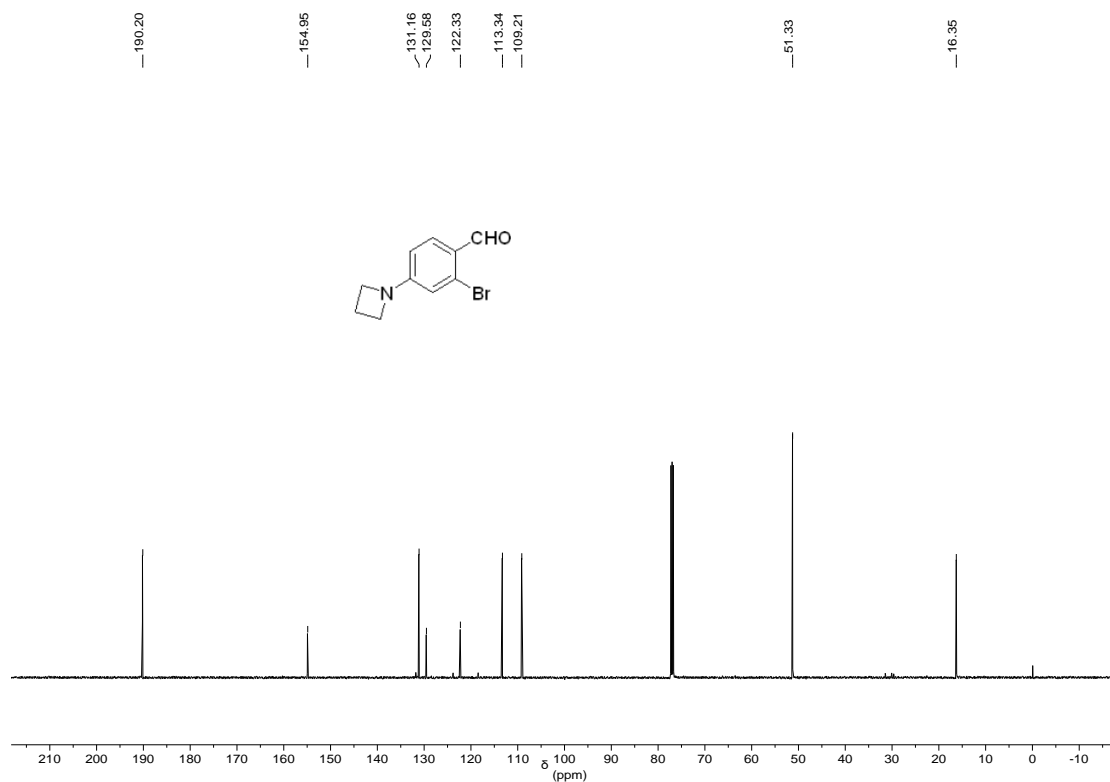

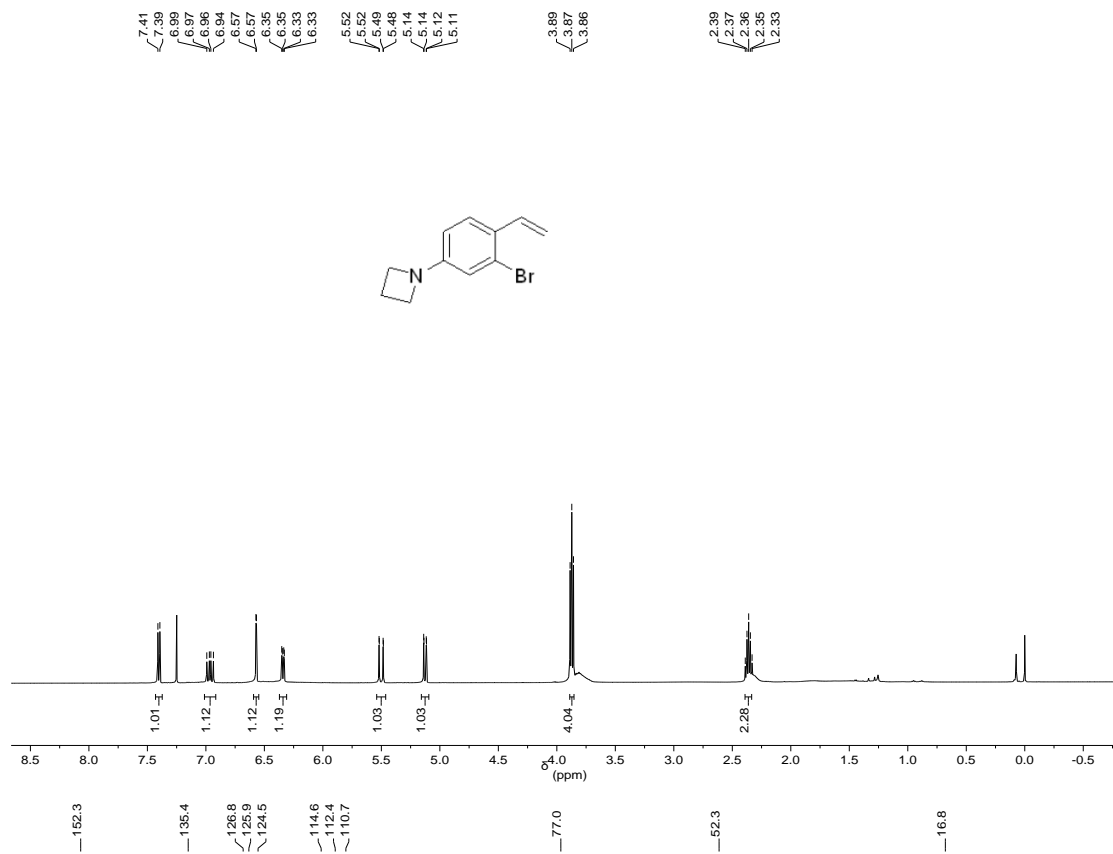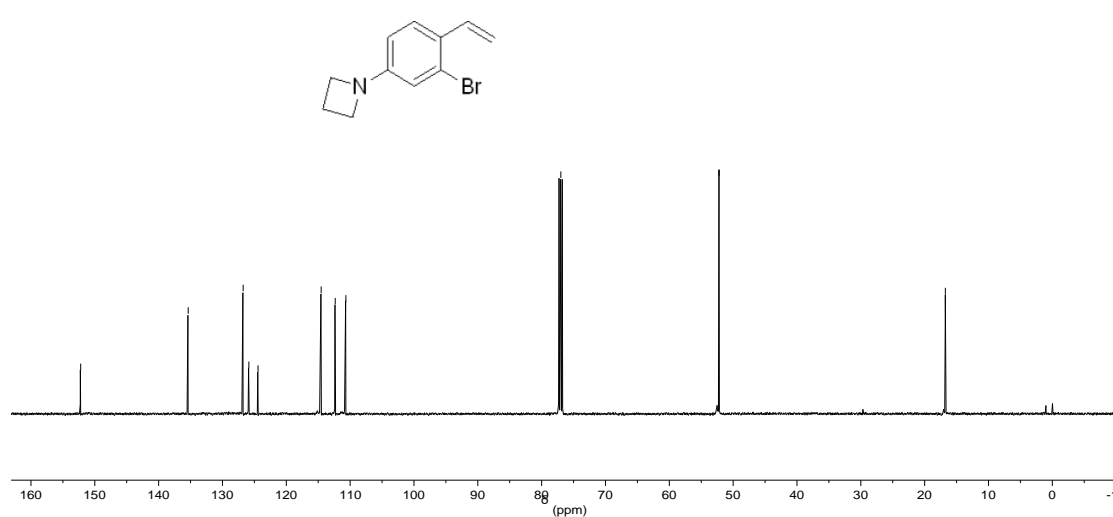

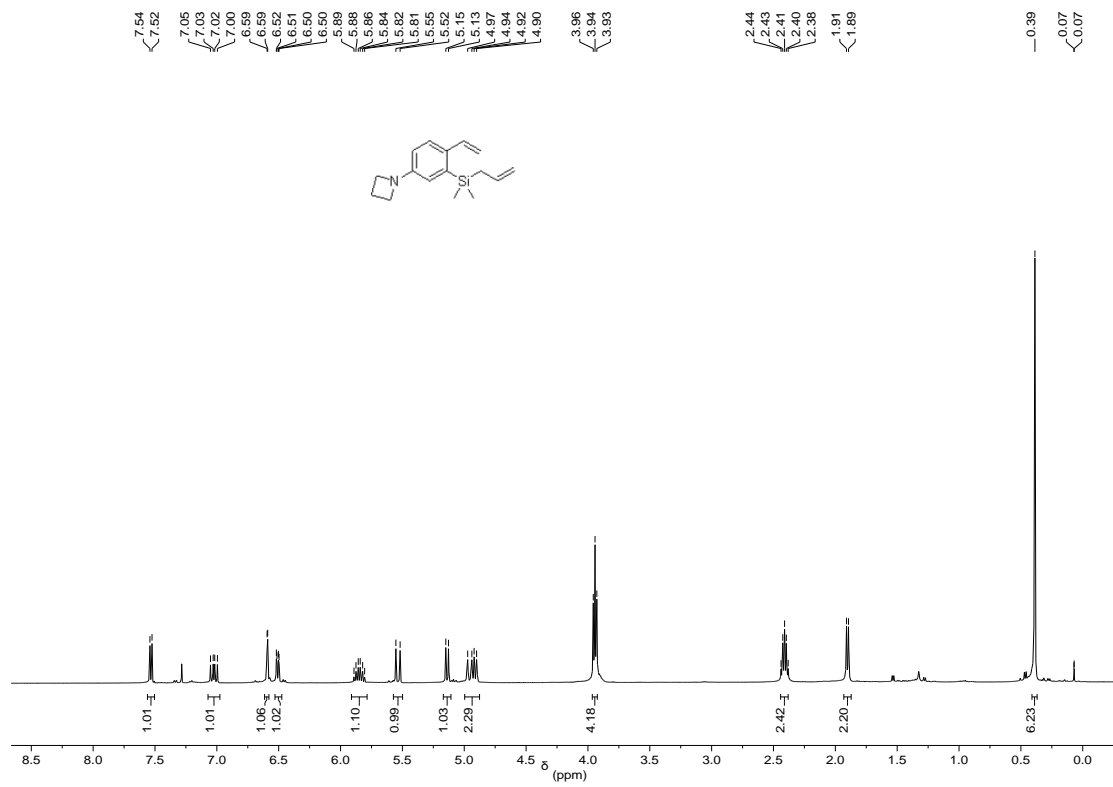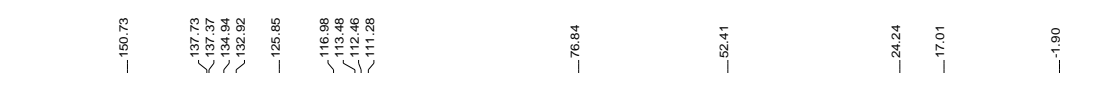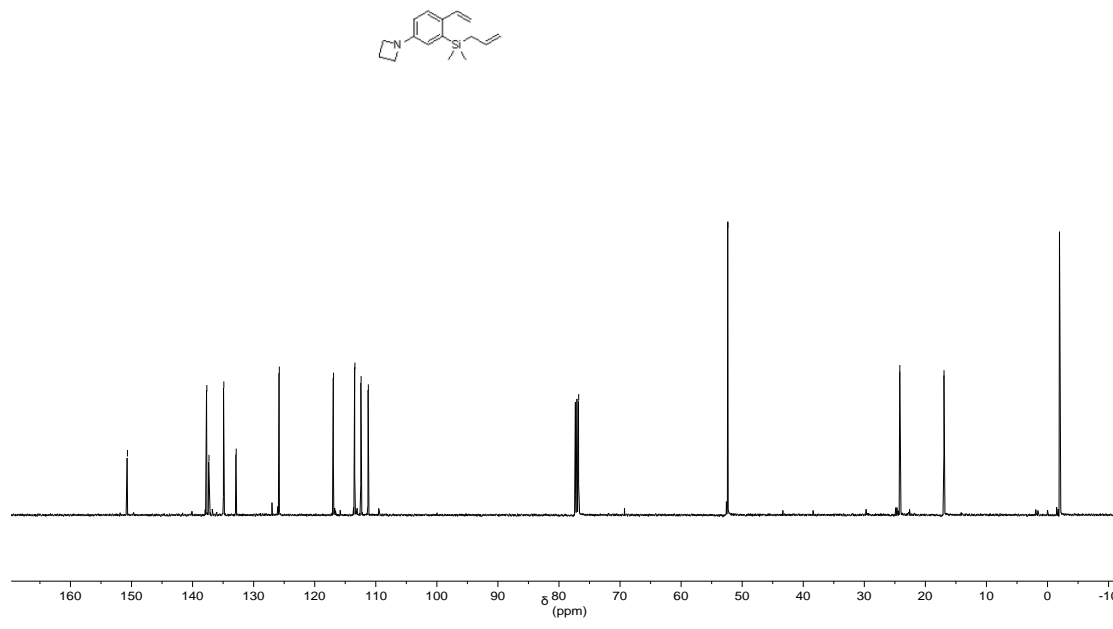

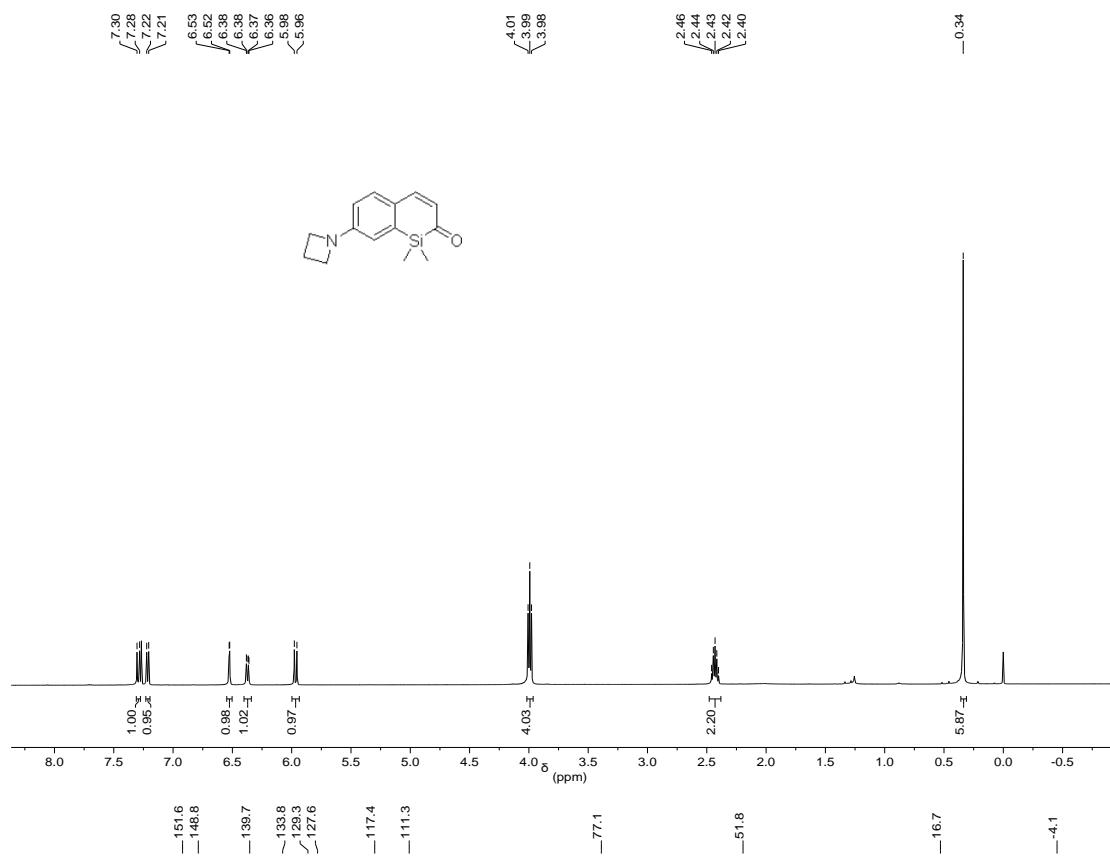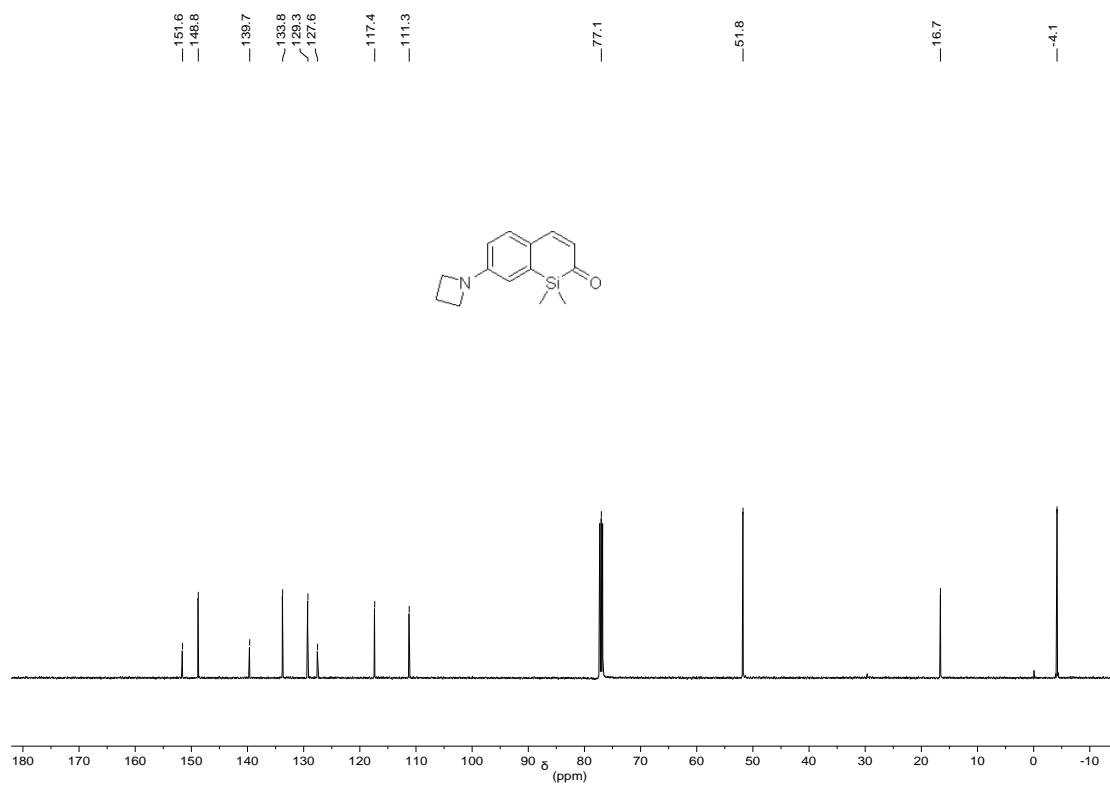

**Compound 2e-5e:**

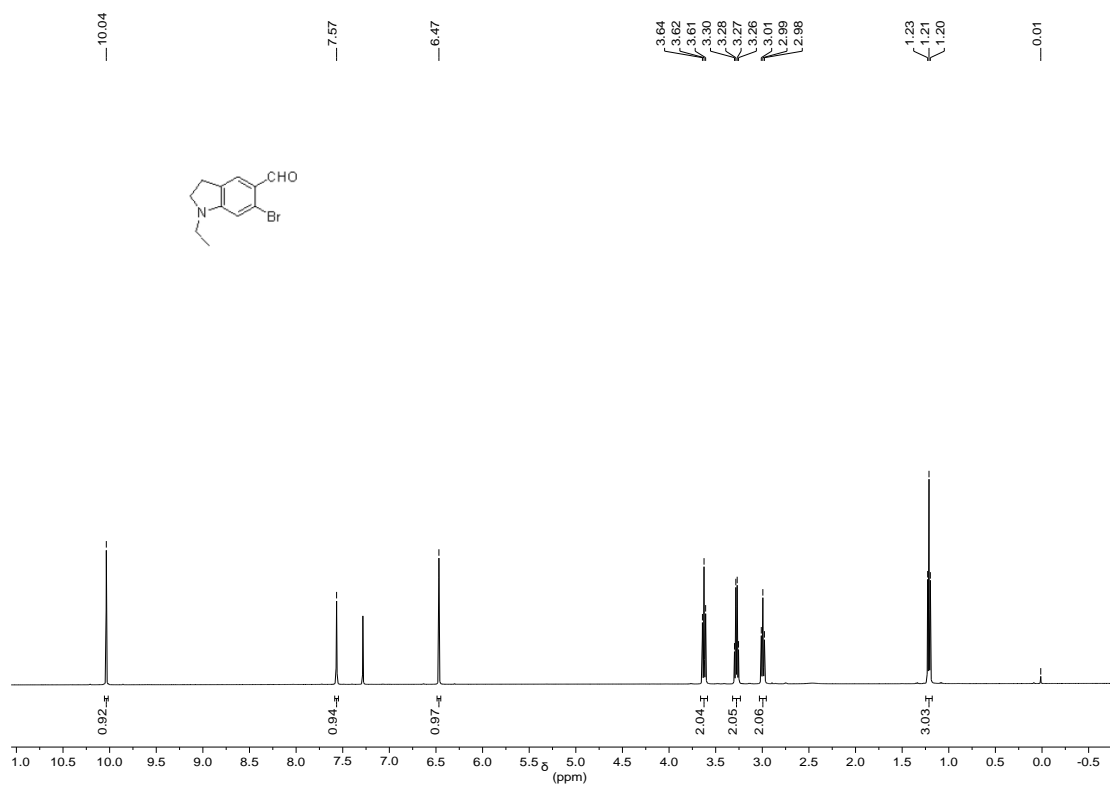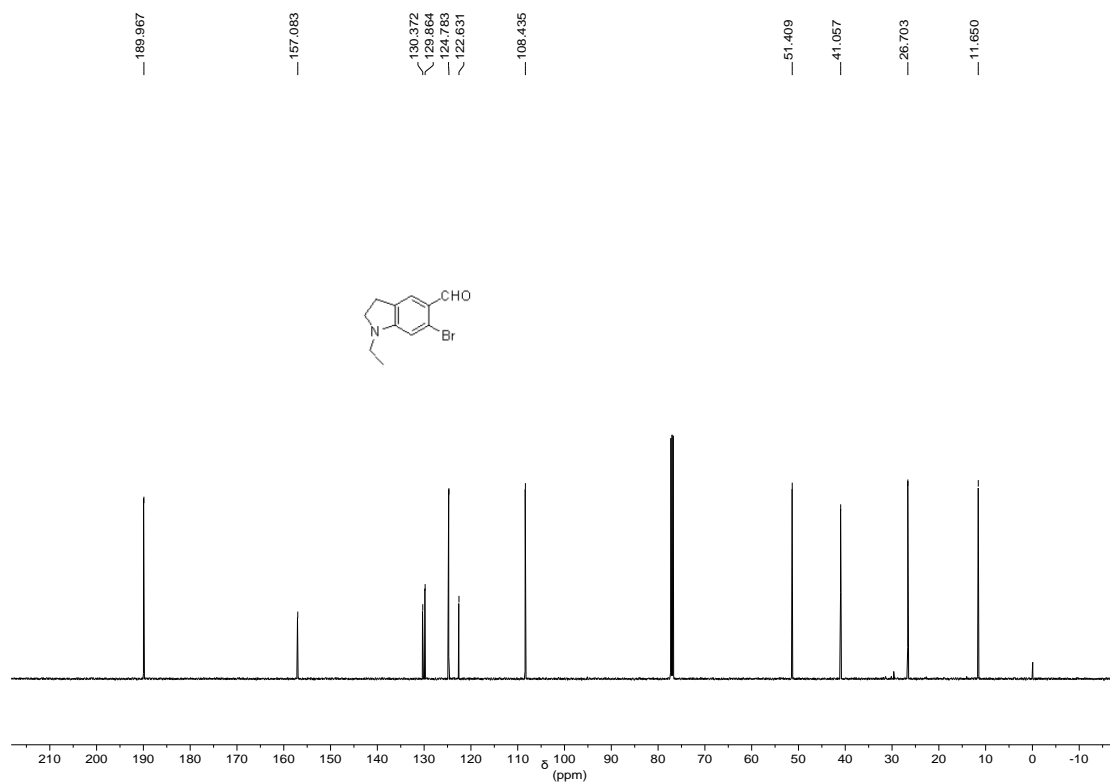

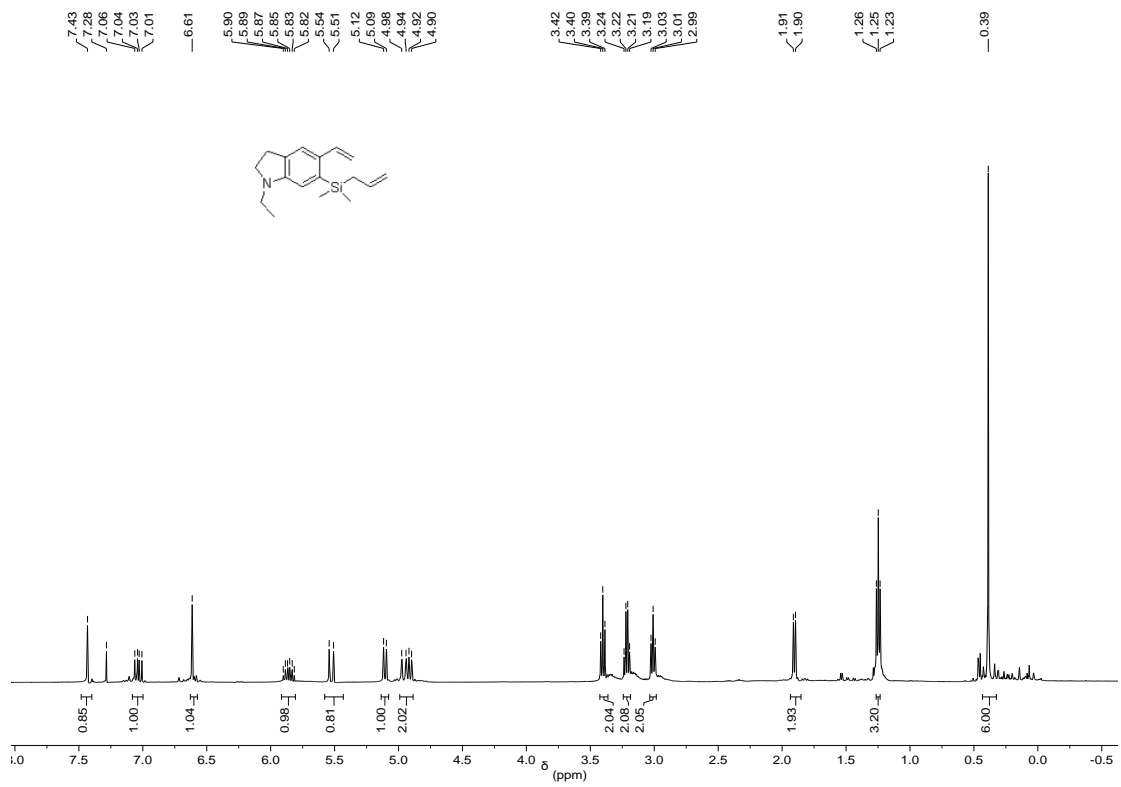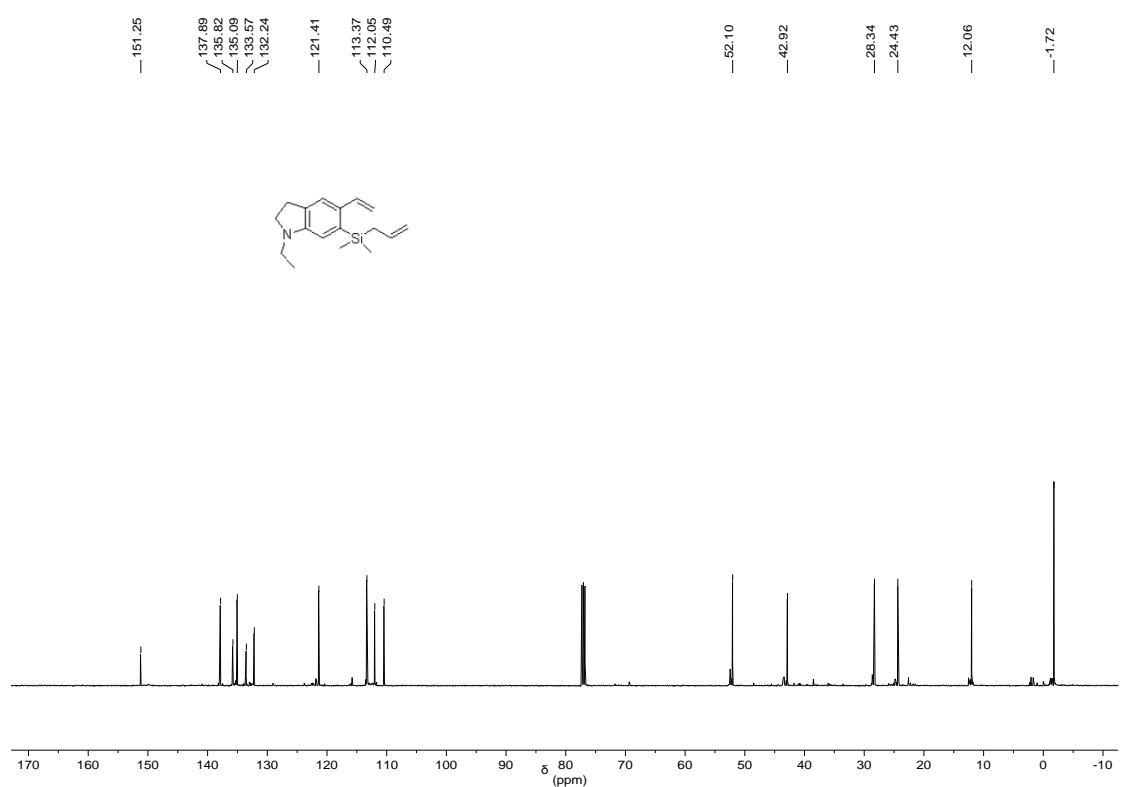



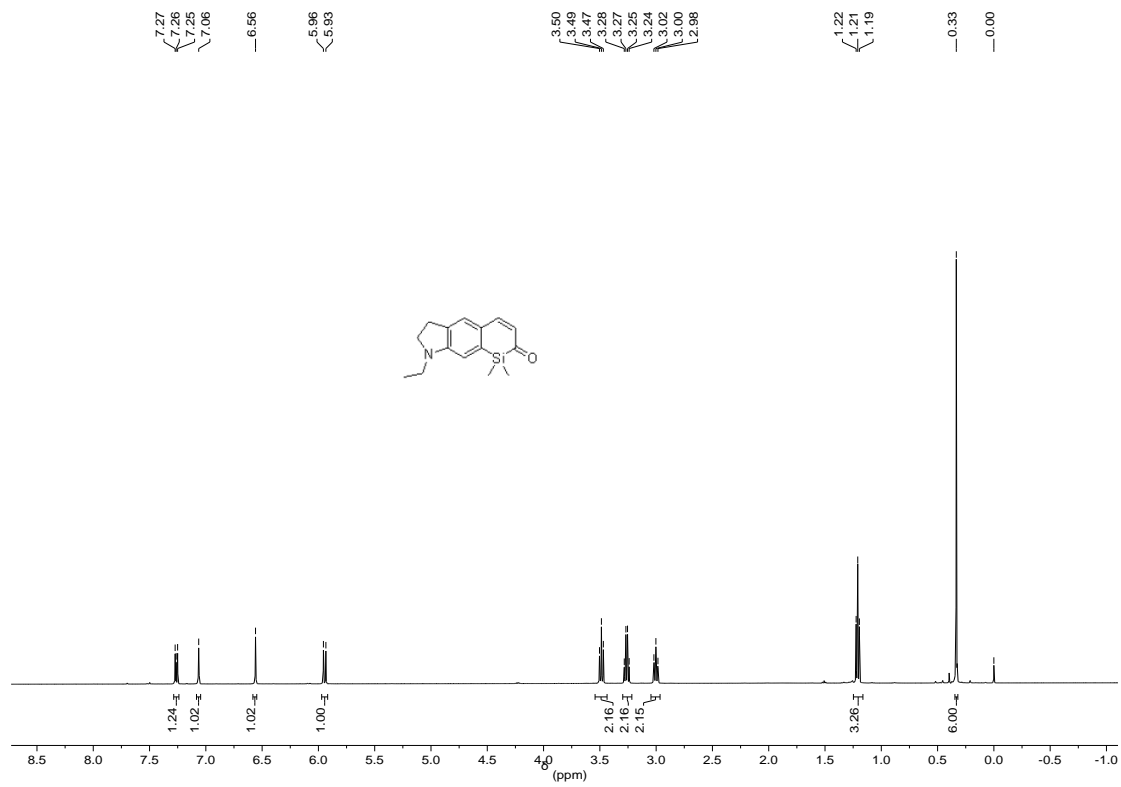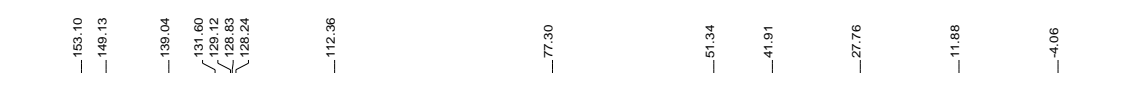

**Compound 2f-5f:**

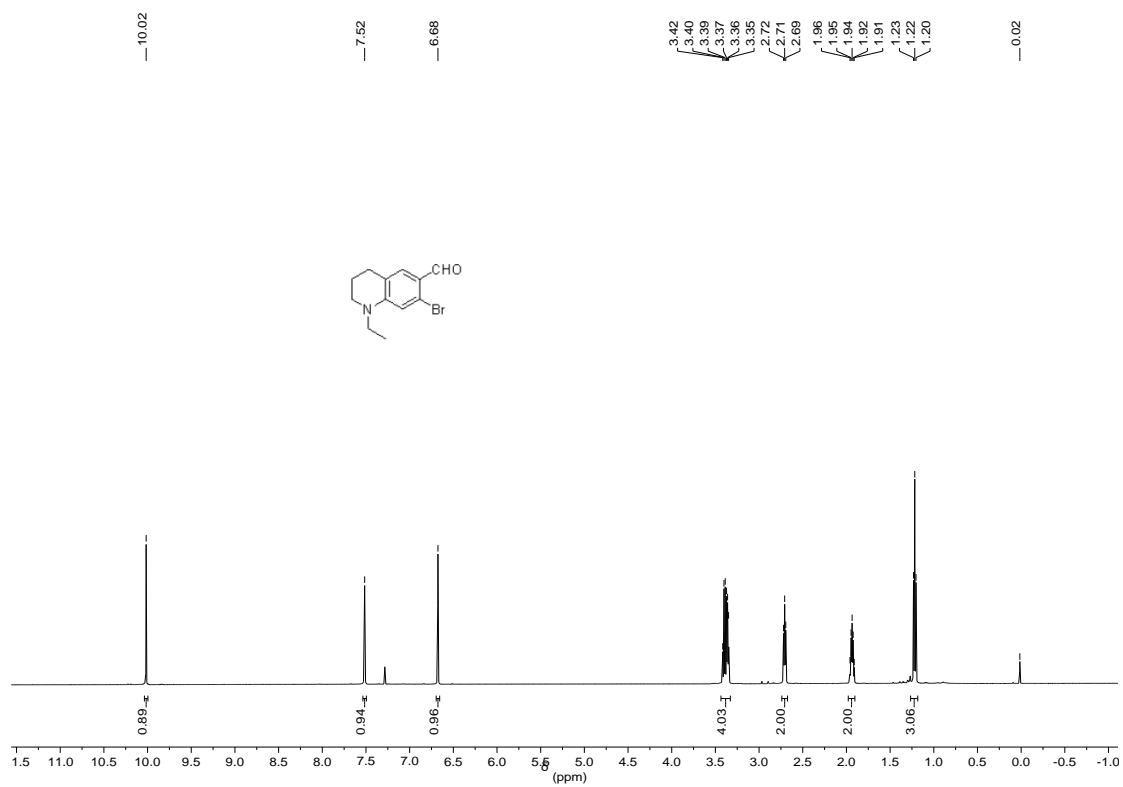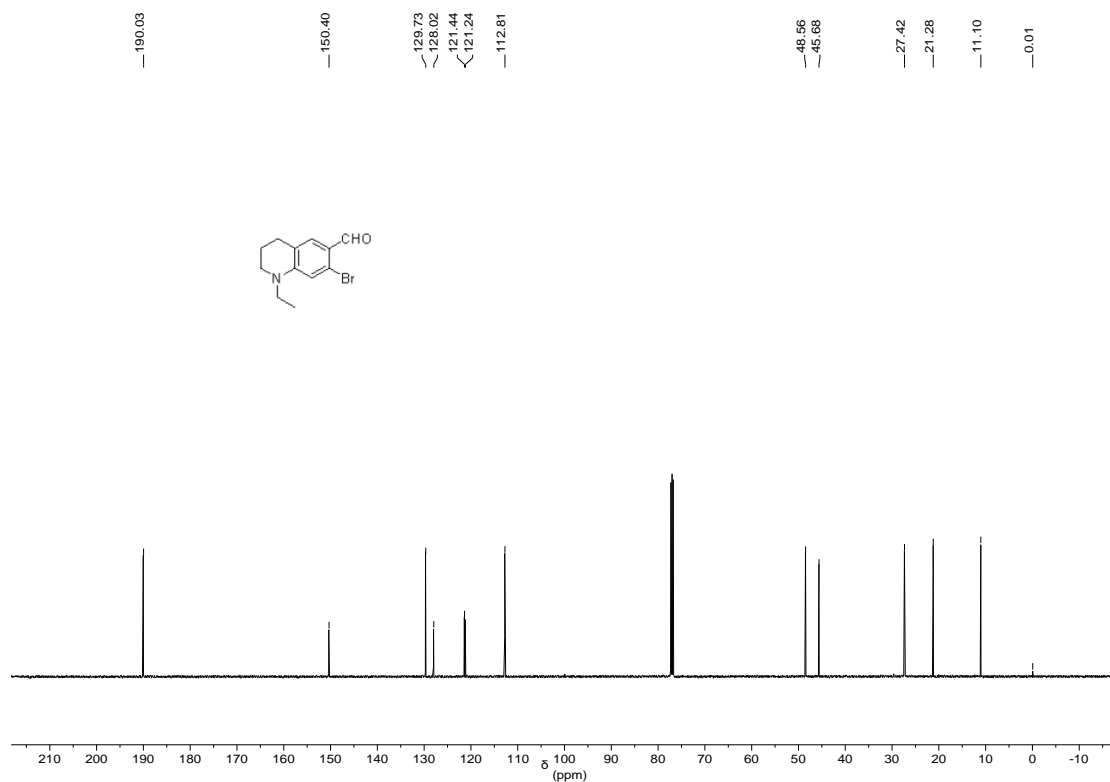

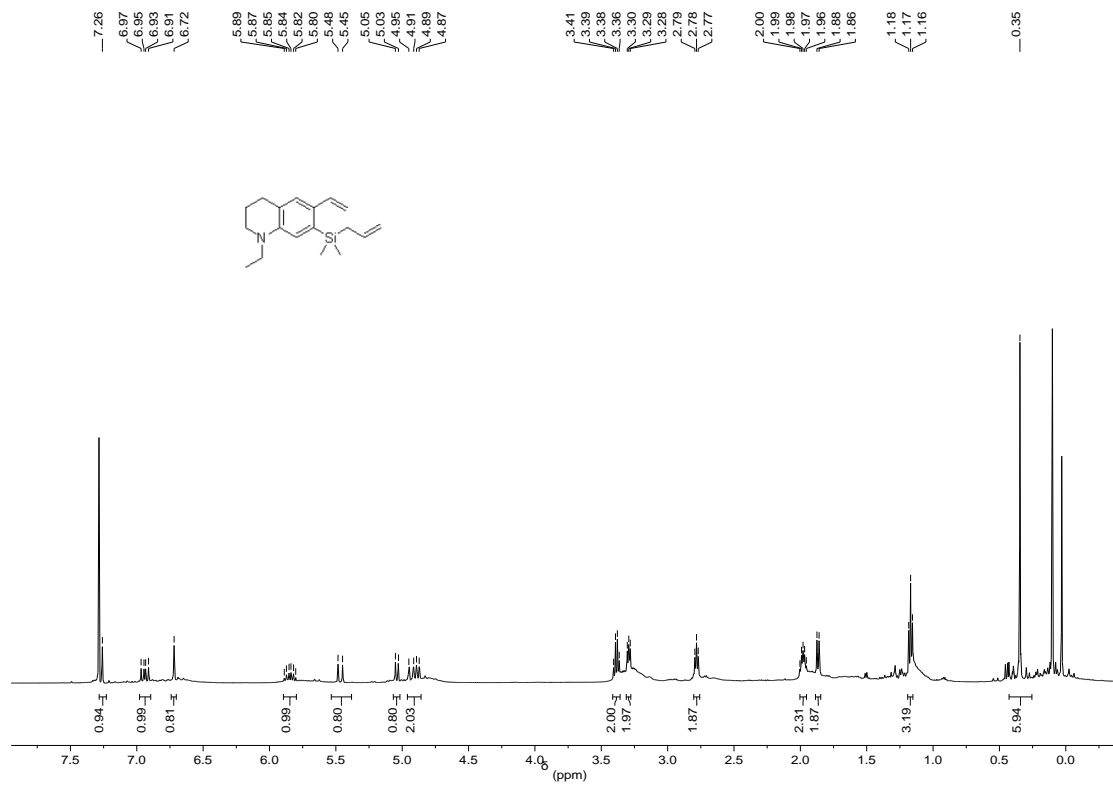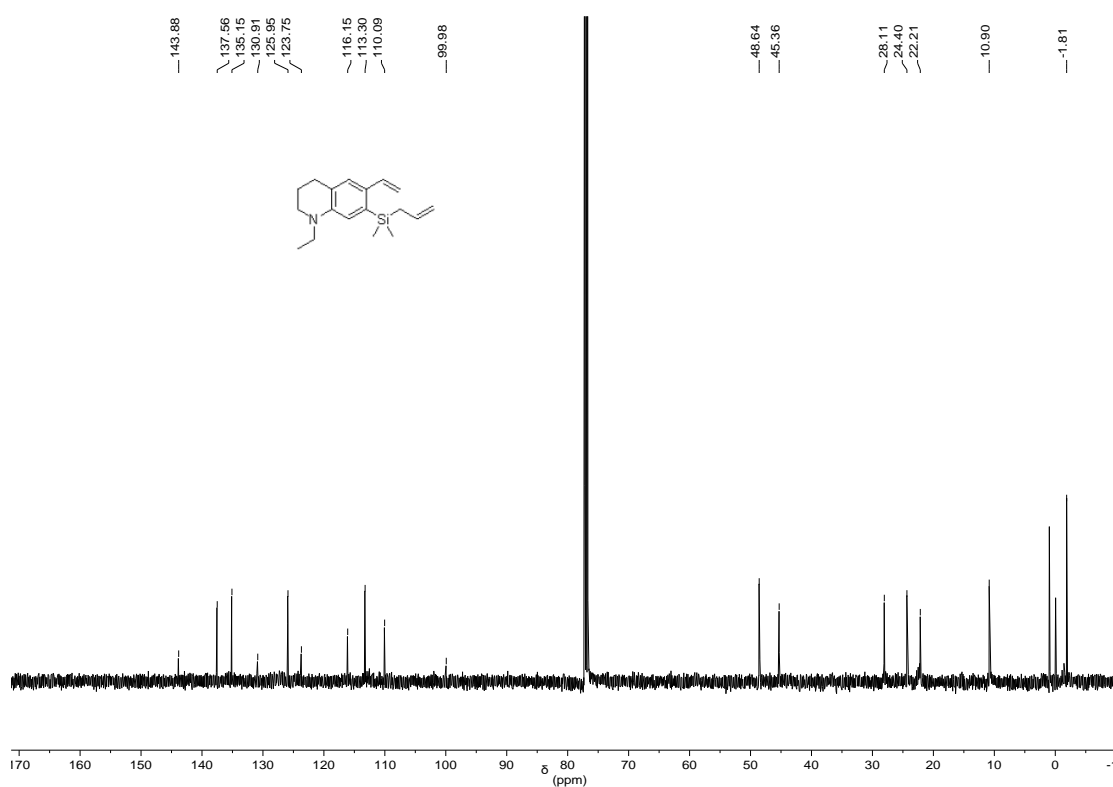

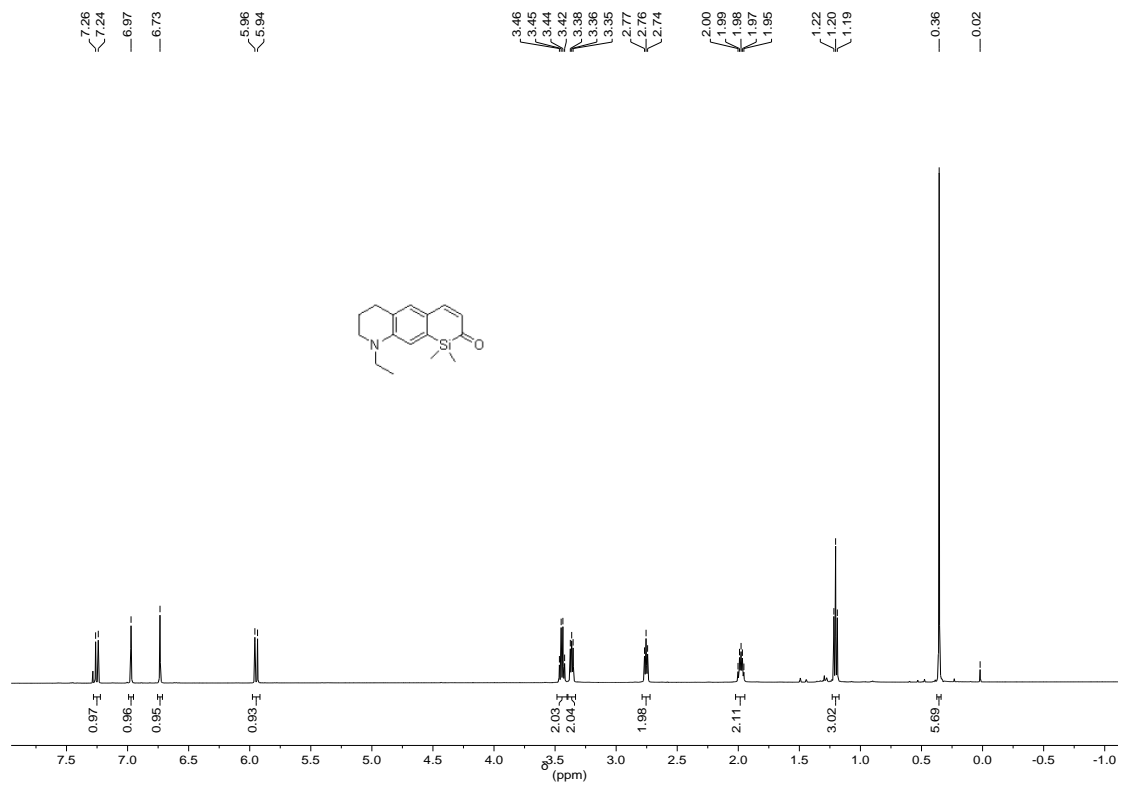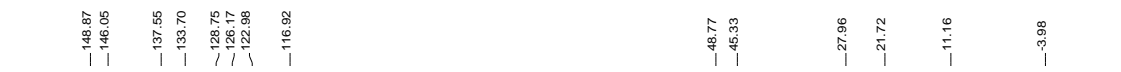

# HRMS

## Mass Spectrum List Report

### Analysis Info

Analysis Name D:\Data\chem. dep\cuixiaoyan\YJJ-0608-4\_P1-C-4\_01\_9394.d Acquisition Date 6/8/2018 2:47:02 PM  
 Method Tune\_pos\_low\_LC with calibration\_2min.m Operator ECNU-Chem  
 Sample Name YJJ-0608-4 Instrument maXis impact 282001.00122  
 Comment

### Acquisition Parameter

|             |          |                       |           |                  |           |
|-------------|----------|-----------------------|-----------|------------------|-----------|
| Source Type | ESI      | Ion Polarity          | Positive  | Set Nebulizer    | 1.5 Bar   |
| Focus       | Active   | Set Capillary         | 3700 V    | Set Dry Heater   | 180 °C    |
| Scan Begin  | 50 m/z   | Set End Plate Offset  | 500 V     | Set Dry Gas      | 6.0 l/min |
| Scan End    | 1200 m/z | Set Collision Cell RF | 500.0 Vpp | Set Divert Valve | Waste     |

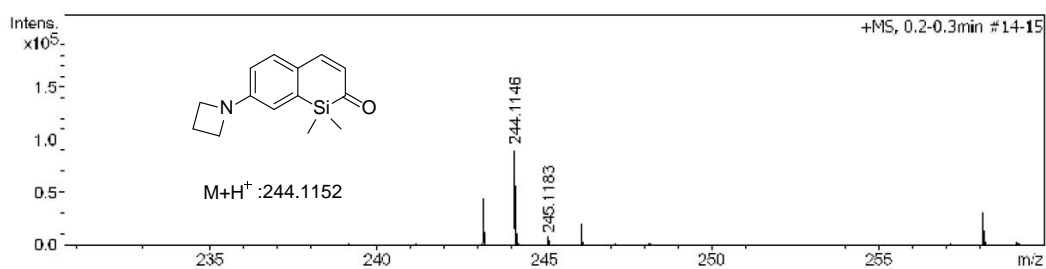

| # | m/z      | Res.  | S/N    | I     | I %   | FWHM   |
|---|----------|-------|--------|-------|-------|--------|
| 1 | 244.1146 | 28485 | 1382.3 | 89926 | 100.0 | 0.0086 |
| 2 | 245.1183 | 17009 | 93.2   | 6077  | 6.8   | 0.0144 |

| Meas. m/z | # | Ion Formula                          | m/z      | err [ppm] | mSigma | Score | rdb    | e   | Conf | N-Rule |
|-----------|---|--------------------------------------|----------|-----------|--------|-------|--------|-----|------|--------|
| 244.1146  | 1 | C <sub>14</sub> H <sub>18</sub> NOSi | 244.1152 | 2.5       | 75.7   | 1     | 100.00 | 7.5 | even | ok     |

## Mass Spectrum List Report

**Analysis Info**

Acquisition Date 1/24/2019 11:32:16 AM  
 Analysis Name D:\Data\chem. dep\cuixiaoyan\LC-0123-1\_P1-C-2\_01\_12534.d  
 Method Tune\_pos\_low\_LC with calibration\_2min.m Operator ECNU-Chem  
 Sample Name LC-0123-1 Instrument maXis impact 282001.00122  
 Comment

**Acquisition Parameter**

|             |          |                       |           |                  |           |
|-------------|----------|-----------------------|-----------|------------------|-----------|
| Source Type | ESI      | Ion Polarity          | Positive  | Set Nebulizer    | 1.5 Bar   |
| Focus       | Active   | Set Capillary         | 3700 V    | Set Dry Heater   | 180 °C    |
| Scan Begin  | 50 m/z   | Set End Plate Offset  | 500 V     | Set Dry Gas      | 2.0 l/min |
| Scan End    | 1200 m/z | Set Collision Cell RF | 500.0 Vpp | Set Divert Valve | Waste     |

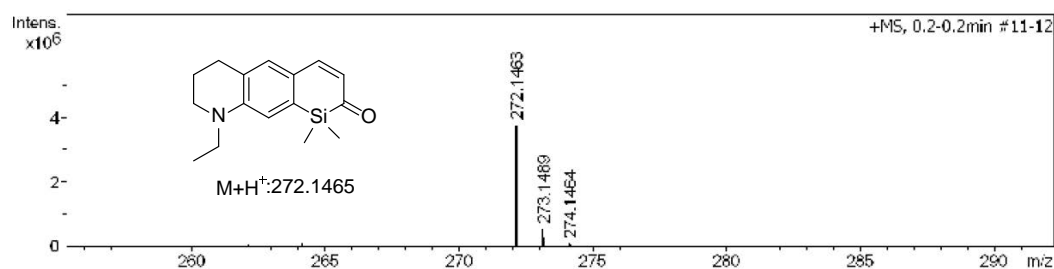

| # | m/z      | Res.  | S/N     | I       | I %   | FWHM   |
|---|----------|-------|---------|---------|-------|--------|
| 1 | 272.1463 | 48015 | 19589.2 | 3760468 | 100.0 | 0.0057 |
| 2 | 273.1489 | 30497 | 2874.0  | 552588  | 14.7  | 0.0090 |
| 3 | 274.1464 | 17710 | 392.9   | 75674   | 2.0   | 0.0155 |

|           |   |                                      |          |           |        |       |        |     |      |        |
|-----------|---|--------------------------------------|----------|-----------|--------|-------|--------|-----|------|--------|
| Meas. m/z | # | Ion Formula                          | m/z      | err [ppm] | mSigma | Score | rdb    | e   | Conf | N-Rule |
| 272.1463  | 1 | C <sub>16</sub> H <sub>22</sub> NOSi | 272.1465 | 0.8       | 46.3   | 1     | 100.00 | 7.5 | even | ok     |

## Mass Spectrum List Report

**Analysis Info**

Acquisition Date 1/24/2019 11:35:24 AM  
 Analysis Name D:\Data\chem. dep\cuixiaoyan\LC-0123-2\_P1-C-3\_01\_12535.d  
 Method Tune\_pos\_low\_LC with calibration\_2min.m Operator ECNU-Chem  
 Sample Name LC-0123-2 Instrument maXis impact 282001.00122  
 Comment

**Acquisition Parameter**

|             |          |                       |           |                  |           |
|-------------|----------|-----------------------|-----------|------------------|-----------|
| Source Type | ESI      | Ion Polarity          | Positive  | Set Nebulizer    | 1.5 Bar   |
| Focus       | Active   | Set Capillary         | 3700 V    | Set Dry Heater   | 180 °C    |
| Scan Begin  | 50 m/z   | Set End Plate Offset  | 500 V     | Set Dry Gas      | 2.0 l/min |
| Scan End    | 1200 m/z | Set Collision Cell RF | 500.0 Vpp | Set Divert Valve | Waste     |

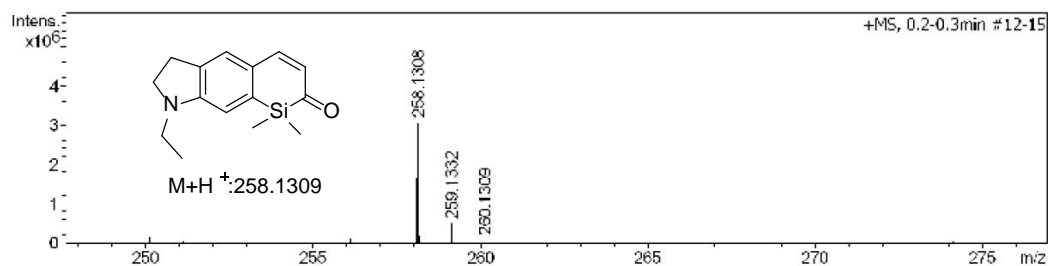

| # | m/z      | Res.  | S/N     | I       | I %   | FWHM   |
|---|----------|-------|---------|---------|-------|--------|
| 1 | 258.1308 | 40249 | 35298.9 | 3051851 | 100.0 | 0.0064 |
| 2 | 259.1332 | 29499 | 5668.7  | 490448  | 16.1  | 0.0088 |
| 3 | 260.1309 | 17639 | 757.7   | 65687   | 2.2   | 0.0147 |

|           |   |                                      |          |           |        |       |        |     |      |        |
|-----------|---|--------------------------------------|----------|-----------|--------|-------|--------|-----|------|--------|
| Meas. m/z | # | Ion Formula                          | m/z      | err [ppm] | mSigma | Score | rdb    | e   | Conf | N-Rule |
| 258.1308  | 1 | C <sub>15</sub> H <sub>20</sub> NOSi | 258.1309 | 0.4       | 34.5   | 1     | 100.00 | 7.5 | even | ok     |

**Analysis Info**

Analysis Name: D:\Data\chem. dep\cuixiaoyan\LC-0301-3\_P1-C-6\_01\_7973.d  
 Method: Tune\_pos\_low\_LC with calibration\_2min.m  
 Sample Name: LC-0301-3  
 Acquisition Date: 3/1/2018 12:23:34 PM  
 Operator: ECNU-Chem  
 Instrument: maXis impact 282001.00122  
 Comment:

**Acquisition Parameter**

Source Type: ESI  
 Focus: Active  
 Scan Begin: 50 m/z  
 Scan End: 1200 m/z  
 Ion Polarity: Positive  
 Set Capillary: 3700 V  
 Set End Plate Offset: 500 V  
 Set Collision Cell RF: 500.0 Vpp  
 Set Nebulizer: 1.5 Bar  
 Set Dry Heater: 180 °C  
 Set Dry Gas: 6.0 l/min  
 Set Divert Valve: Waste

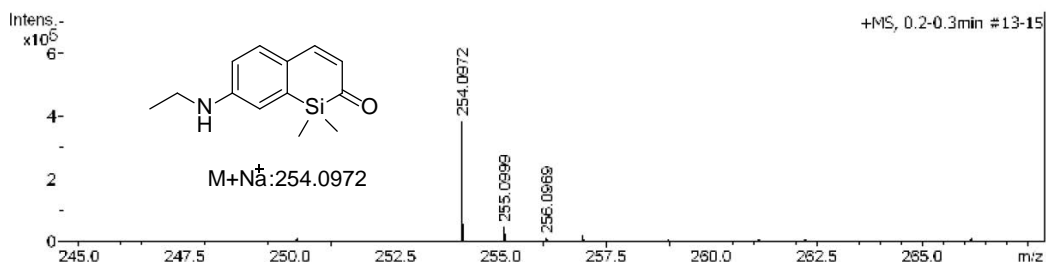

| # | m/z      | Res.  | S/N    | I      | I %   | FWHM   |
|---|----------|-------|--------|--------|-------|--------|
| 1 | 254.0972 | 30335 | 5189.8 | 382554 | 100.0 | 0.0084 |
| 2 | 255.0999 | 20839 | 607.6  | 44870  | 11.7  | 0.0122 |
| 3 | 256.0969 | 15232 | 107.6  | 7950   | 2.1   | 0.0168 |

| Meas. m/z | # | Ion Formula                            | m/z      | err [ppm] | mSigma | Score  | rdb | e    | Conf | N-Rule |
|-----------|---|----------------------------------------|----------|-----------|--------|--------|-----|------|------|--------|
| 254.0972  | 1 | C <sub>13</sub> H <sub>17</sub> NNaOSi | 254.0972 | -0.2      | 43.2   | 100.00 | 6.5 | even |      | ok     |

**Analysis Info**

Analysis Name: D:\Data\chem. dep\cuixiaoyan\LC-0309-1\_P1-D-2\_01\_8053.d  
 Method: Tune\_pos\_low\_LC with calibration\_2min.m  
 Sample Name: LC-0309-1  
 Acquisition Date: 3/9/2018 1:45:09 PM  
 Operator: ECNU-Chem  
 Instrument: maXis impact 282001.00122  
 Comment:

**Acquisition Parameter**

Source Type: ESI  
 Focus: Active  
 Scan Begin: 50 m/z  
 Scan End: 1200 m/z  
 Ion Polarity: Positive  
 Set Capillary: 3700 V  
 Set End Plate Offset: 500 V  
 Set Collision Cell RF: 500.0 Vpp  
 Set Nebulizer: 1.5 Bar  
 Set Dry Heater: 180 °C  
 Set Dry Gas: 6.0 l/min  
 Set Divert Valve: Waste

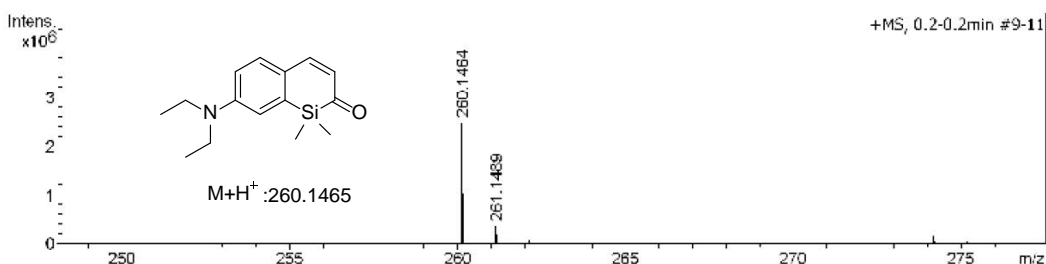

| # | m/z      | Res.  | S/N     | I       | I %   | FWHM   |
|---|----------|-------|---------|---------|-------|--------|
| 1 | 260.1464 | 50680 | 33937.7 | 2463023 | 100.0 | 0.0051 |
| 2 | 261.1459 | 32029 | 4793.9  | 348435  | 14.1  | 0.0082 |
| 3 | 262.1513 | 8202  | 531.1   | 38713   | 1.6   | 0.0320 |

| Meas. m/z | # | Ion Formula                          | m/z      | err [ppm] | mSigma | Score  | rdb | e    | Conf | N-Rule |
|-----------|---|--------------------------------------|----------|-----------|--------|--------|-----|------|------|--------|
| 260.1464  | 1 | C <sub>15</sub> H <sub>22</sub> NOSi | 260.1465 | 0.4       | 44.4   | 100.00 | 6.5 | even |      | ok     |

## Mass Spectrum List Report

**Analysis Info** Acquisition Date 2/28/2018 11:48:01 AM  
 Analysis Name D:\Data\chem. dep\cuixiaoyan\LC-0228-1\_P1-B-3\_01\_7965.d  
 Method Tune\_pos\_low\_LC with calibration\_2min.m Operator ECNU-Chem  
 Sample Name LC-0228-1 Instrument maXis impact 282001.00122  
 Comment

**Acquisition Parameter**  
 Source Type ESI Ion Polarity Positive Set Nebulizer 1.5 Bar  
 Focus Active Set Capillary 3700 V Set Dry Heater 180 °C  
 Scan Begin 50 m/z Set End Plate Offset-500 V Set Dry Gas 6.0 l/min  
 Scan End 1200 m/z Set Collision Cell RF500.0 Vpp Set Divert Valve Waste

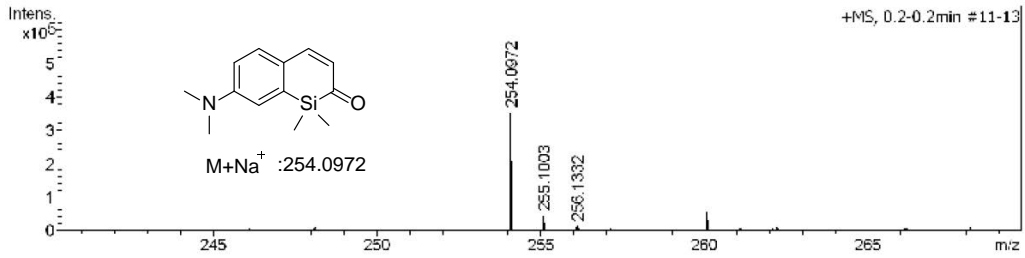

| # | m/z      | Res.  | S/N    | I      | I %   | FWHM   |
|---|----------|-------|--------|--------|-------|--------|
| 1 | 254.0972 | 28939 | 4526.0 | 351402 | 100.0 | 0.0088 |
| 2 | 255.1003 | 18716 | 549.2  | 42716  | 12.2  | 0.0136 |
| 3 | 256.1332 | 13790 | 150.0  | 11689  | 3.3   | 0.0186 |

| Meas. m/z | # | Ion Formula  | m/z      | err [ppm] | mSigma | Score | rdB    | e   | Conf | N-Rule |
|-----------|---|--------------|----------|-----------|--------|-------|--------|-----|------|--------|
| 254.0972  | 1 | C13H17NNaOSi | 254.0972 | 0.0       | 40.4   | 1     | 100.00 | 6.5 | even | ok     |
